# Supplementary material
Source: PubMed Central journal article supplement (PMC4491997)

**A**

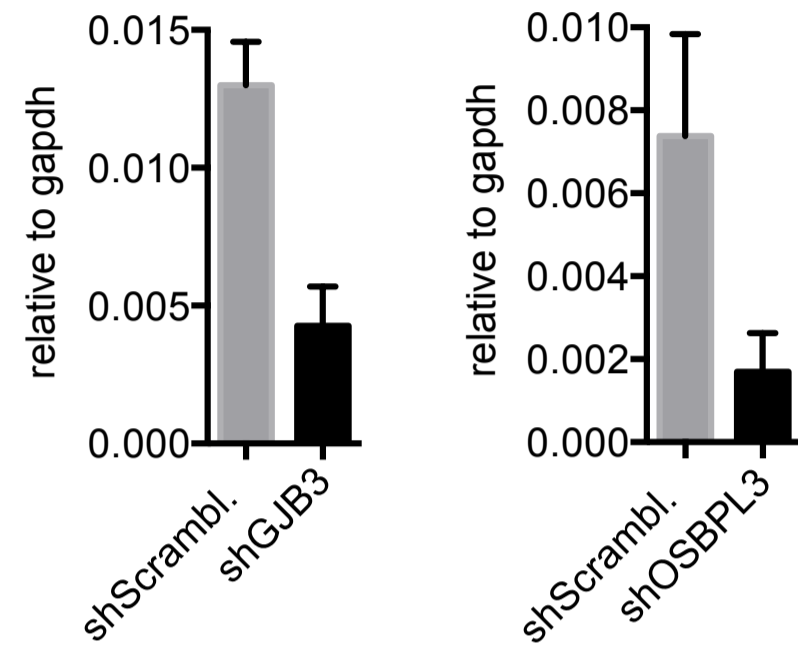

**B**

Labelling of freshly isolated HSCs:

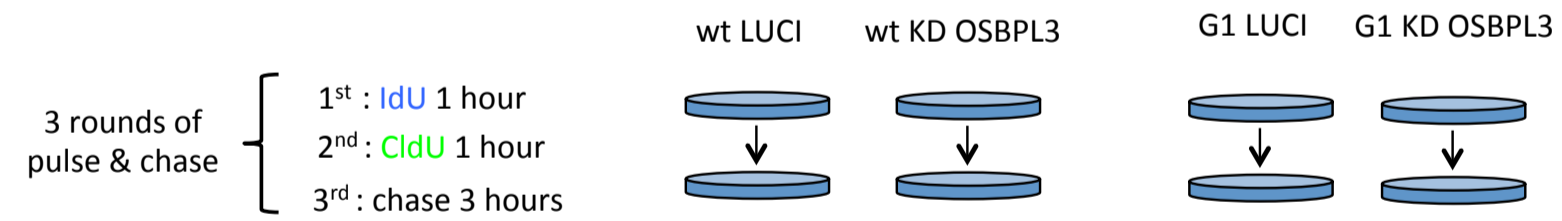

Combing

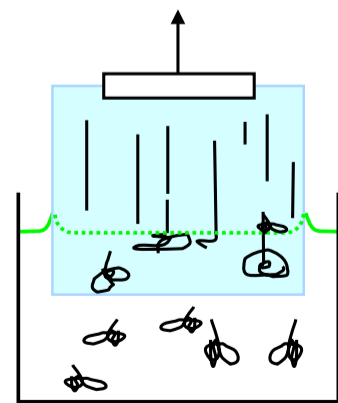

ImmunoFISH

FISH with PNA - Telomeric probe  
IdU and CldU immunodetection

**C**

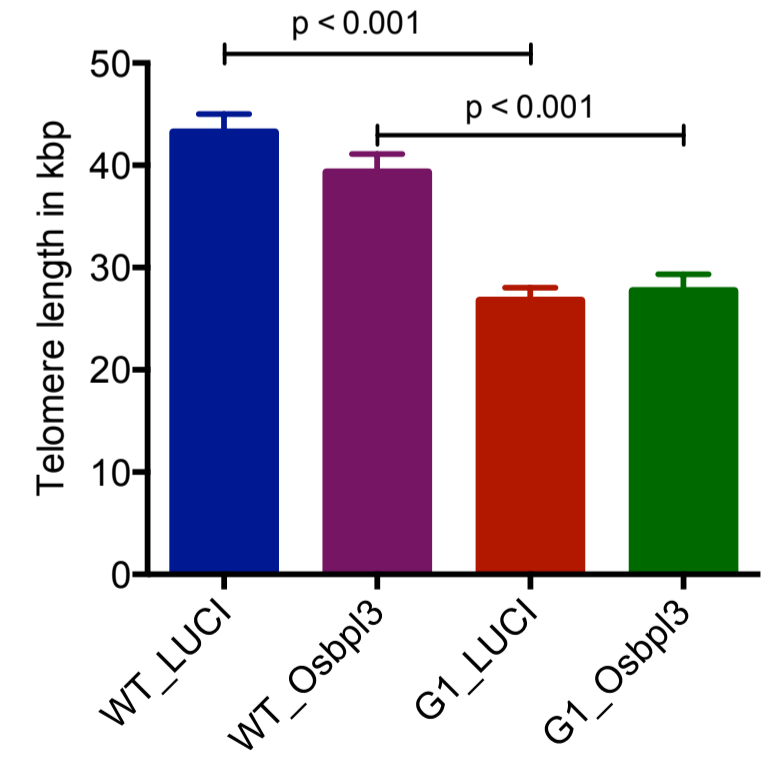

Supplement: embj0034-1371-sd7.pdf [file embj0034-1371-sd7.pdf]
