# Supplementary material
Source: PubMed Central journal article supplement (PMC4491997)
Supplement: embj0034-1371-sd8.pdf [file embj0034-1371-sd8.pdf]

**Table S1**

|                           | number of analyzed cells | Number of cells with numerical aberration | Number of cells with structural aberration | % aneuploidy | Type of aberration (examples) | Polyploid cells   |
|---------------------------|--------------------------|-------------------------------------------|--------------------------------------------|--------------|-------------------------------|-------------------|
| <b>BJ PD 54</b>           | <b>103</b>               | <b>6</b>                                  | <b>0</b>                                   | <b>5.8</b>   | <b>45, XY, -19</b>            | <b>0/37</b>       |
|                           |                          |                                           |                                            |              | <b>45, XY, -20</b>            |                   |
| <b>BJ hTERT scrambled</b> | <b>167</b>               | <b>12</b>                                 | <b>0</b>                                   | <b>7.1</b>   | <b>45, XY, -19</b>            | <b>0/38</b>       |
|                           |                          |                                           |                                            |              | <b>45, XY, -10</b>            |                   |
| <b>BJ-hTERT GJB3</b>      | <b>62</b>                | <b>15</b>                                 | <b>0</b>                                   | <b>24.1</b>  | <b>44, XY, -20, -22</b>       | <b>0/38</b>       |
|                           |                          |                                           |                                            |              | <b>45, XY, -22</b>            |                   |
|                           |                          |                                           |                                            |              | <b>45, XY, -19</b>            |                   |
|                           |                          |                                           |                                            |              | <b>45, X, -Y</b>              |                   |
|                           |                          |                                           |                                            |              | <b>44, XY, -16, -20</b>       |                   |
| <b>BJ-hTERT RXFP1</b>     | <b>166</b>               | <b>43</b>                                 | <b>0</b>                                   | <b>25.9</b>  | <b>44, XY, -4, -10</b>        | <b>3/38</b>       |
|                           |                          |                                           |                                            |              | <b>44, XY, -12, -21</b>       | <b>tetraploid</b> |
|                           |                          |                                           |                                            |              | <b>45, XY, -20</b>            |                   |
|                           |                          |                                           |                                            |              | <b>47, XY, +11</b>            |                   |
|                           |                          |                                           |                                            |              | <b>46, XY, +11, -22</b>       |                   |
| <b>BJ-hTERT STARD9</b>    | <b>62</b>                | <b>24</b>                                 | <b>0</b>                                   | <b>38.7</b>  | <b>45, XY, -10</b>            | <b>0/39</b>       |
|                           |                          |                                           |                                            |              | <b>45, XY, -22</b>            |                   |
|                           |                          |                                           |                                            |              | <b>45, XY, -6</b>             |                   |
|                           |                          |                                           |                                            |              | <b>45, XY, -18</b>            |                   |
| <b>BJ-hTERT OSBPL3</b>    | <b>161</b>               | <b>37</b>                                 | <b>0</b>                                   | <b>22.9</b>  | <b>45, XY, -2</b>             | <b>2/37</b>       |
|                           |                          |                                           |                                            |              | <b>45, XY, -14</b>            | <b>tetraploid</b> |
|                           |                          |                                           |                                            |              | <b>45, XY, -16</b>            |                   |
|                           |                          |                                           |                                            |              | <b>44, XY, -18, -22</b>       |                   |
|                           |                          |                                           |                                            |              | <b>47, XY, +mar</b>           |                   |
|                           |                          |                                           |                                            |              | <b>45, XY, -17</b>            |                   |
