# Supplementary material
Source: PubMed Central journal article supplement (PMC4491997)

Controls

shRNA against aneuploidy inducing genes

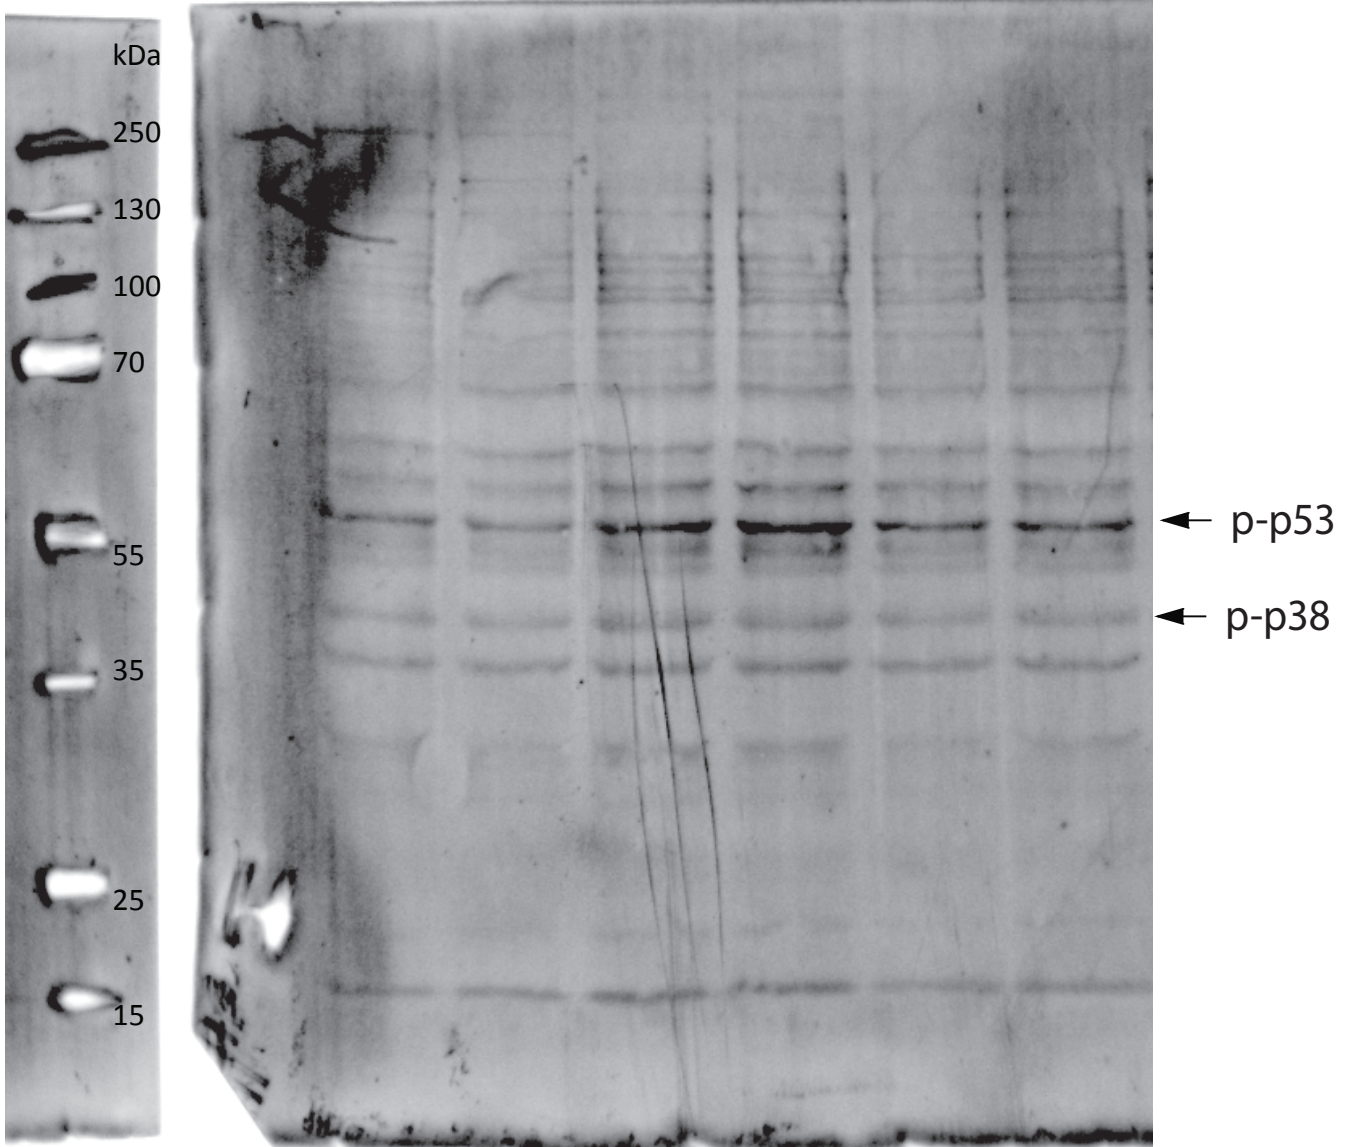

Controls

shRNA against aneuploidy inducing genes

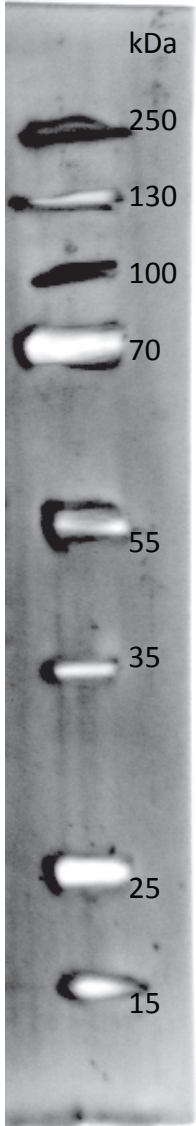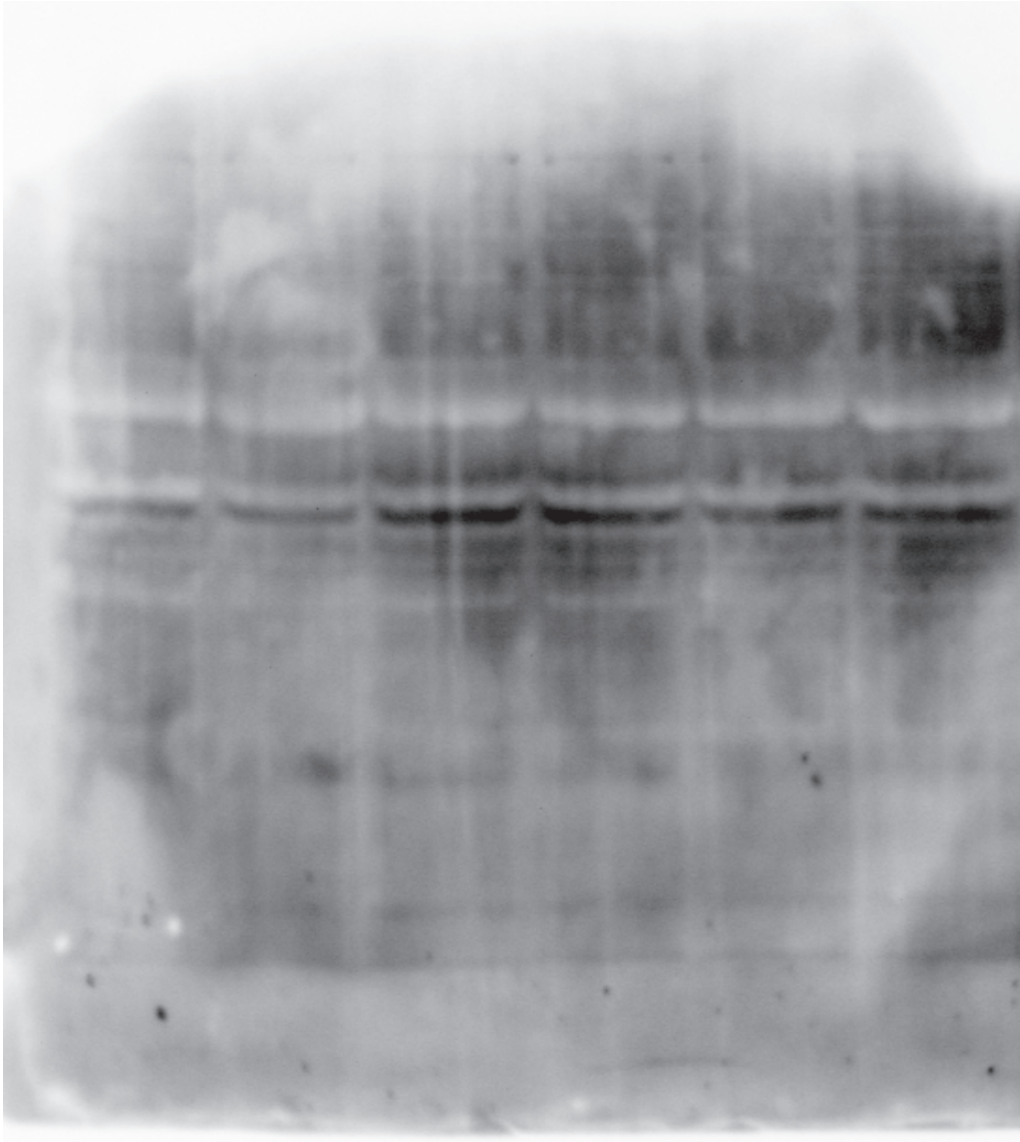

← p-p53

Controls

shRNA against aneuploidy inducing genes

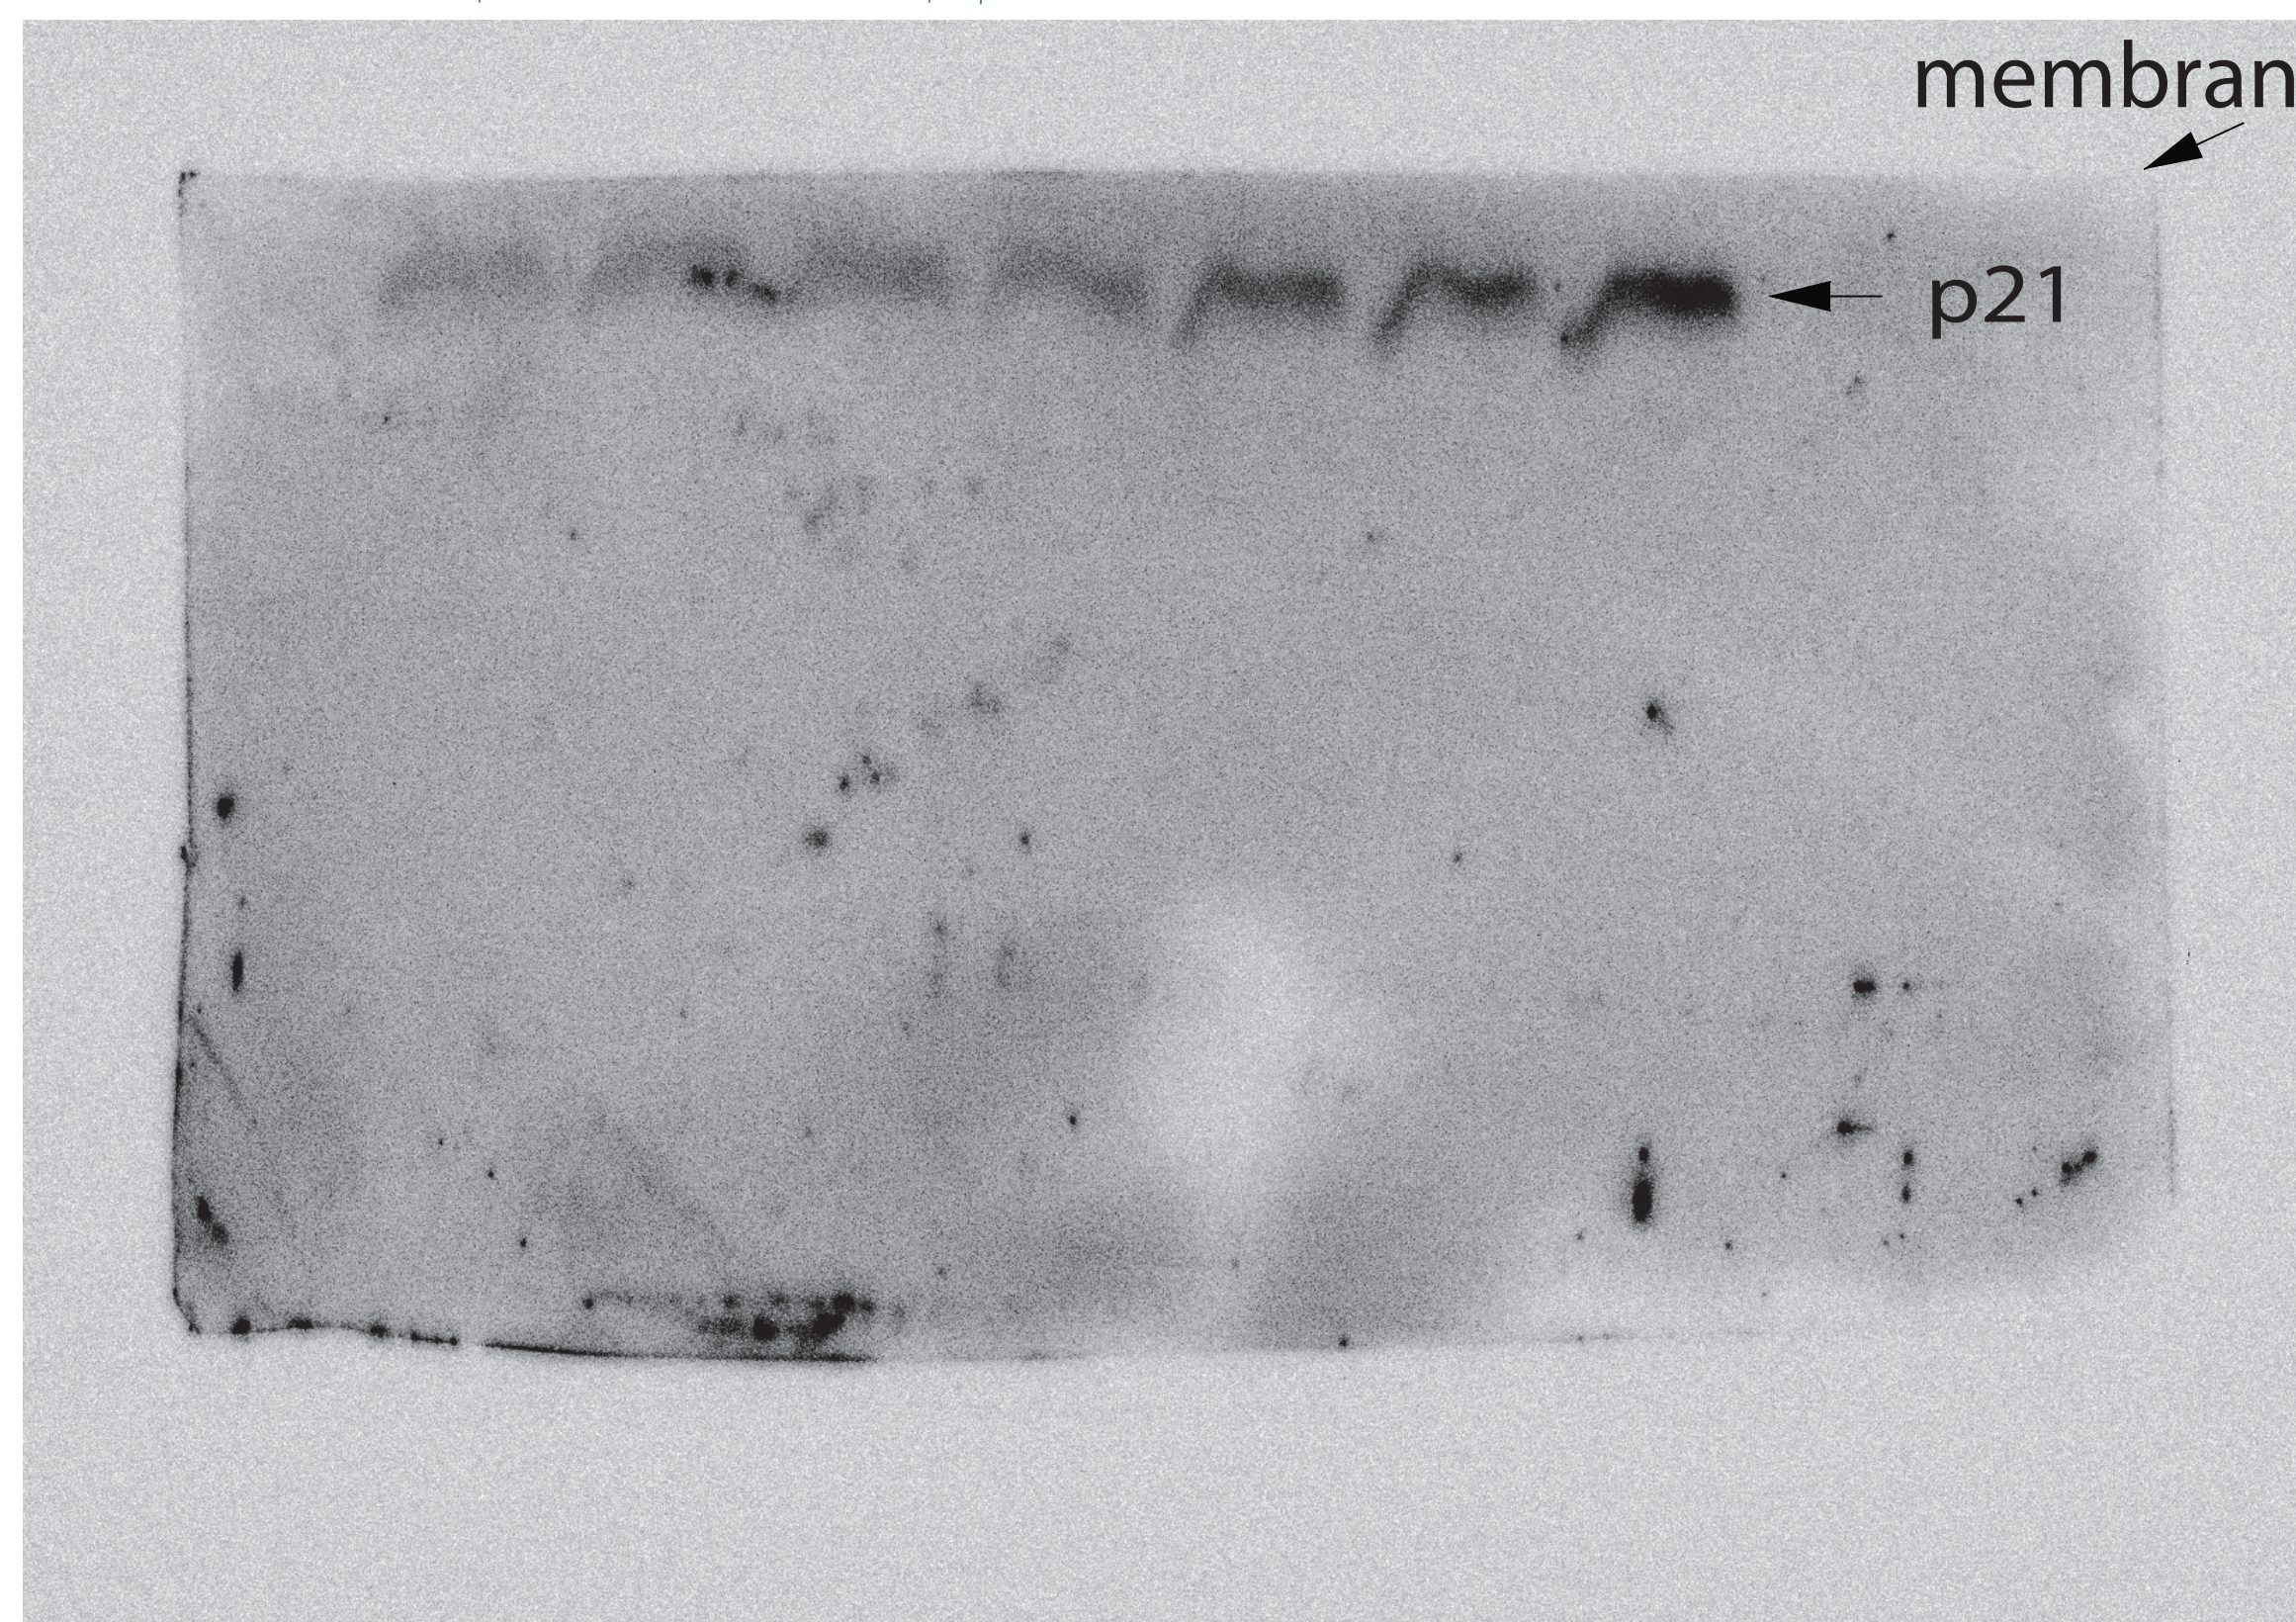

membrane was cut here

p21

Controls

shRNA against aneuploidy inducing genes

← GAPDH

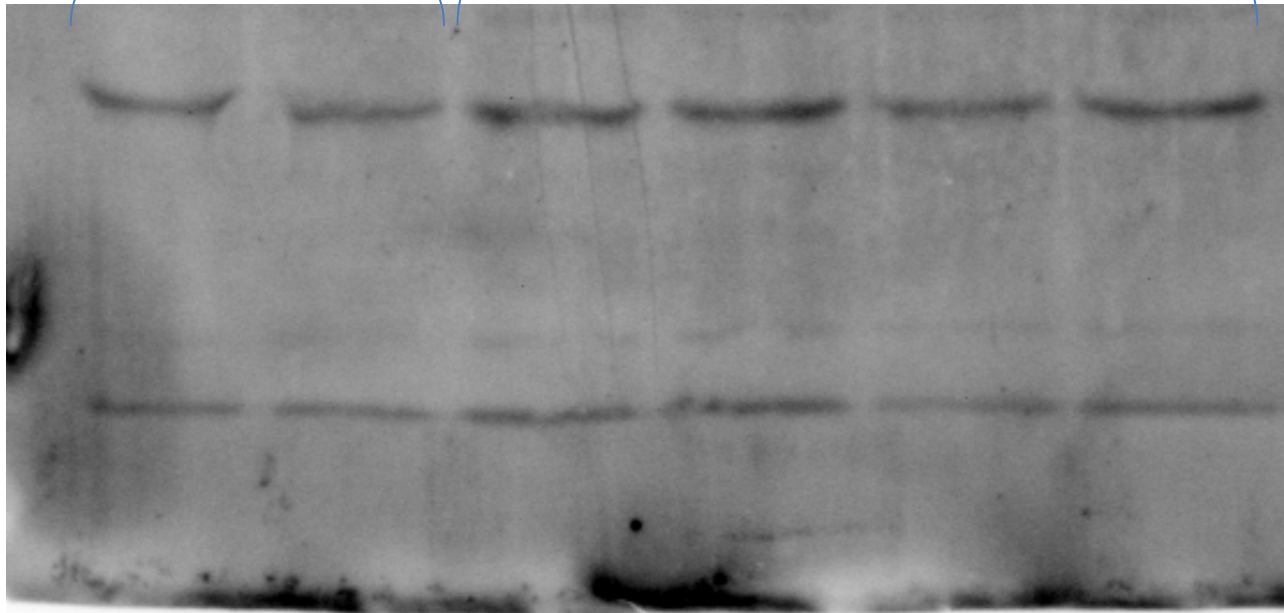

Supplement: embj0034-1371-sd12.pdf [file embj0034-1371-sd12.pdf]
