# Supplementary material
Source: PubMed Central journal article supplement (PMC4491997)

**A: KD 1st shRNA**

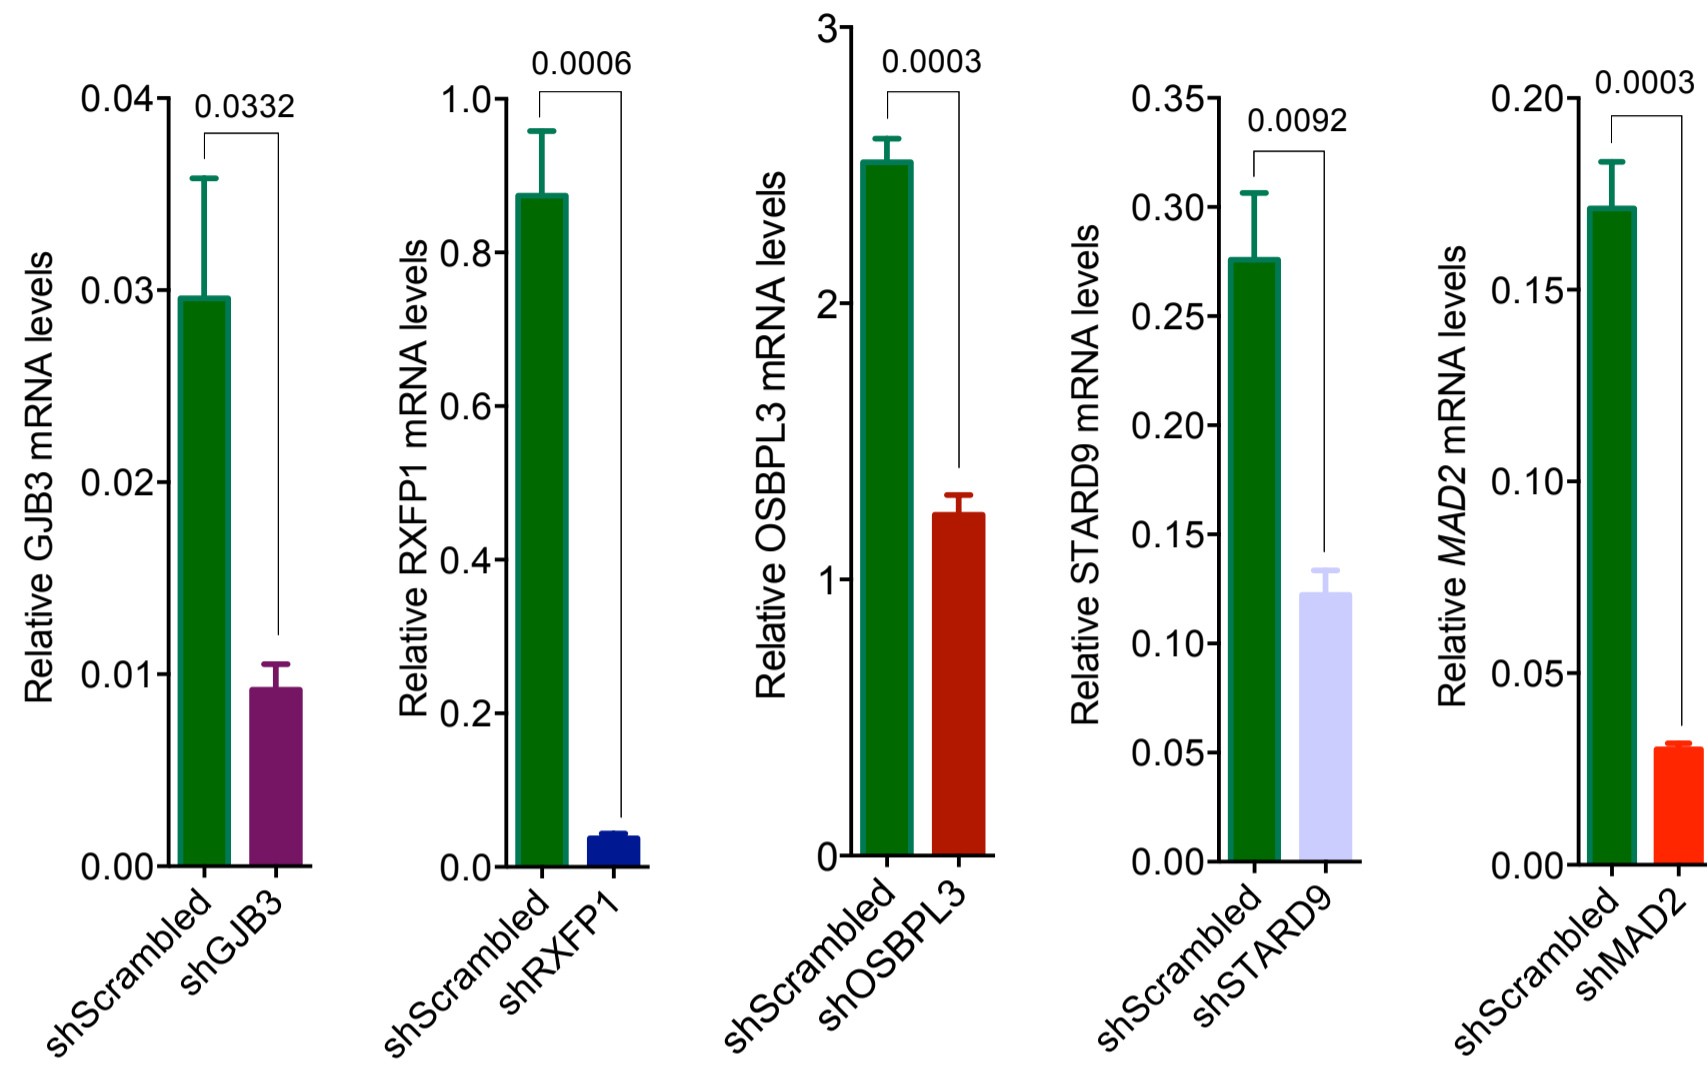

**B: KD 2nd shRNA**

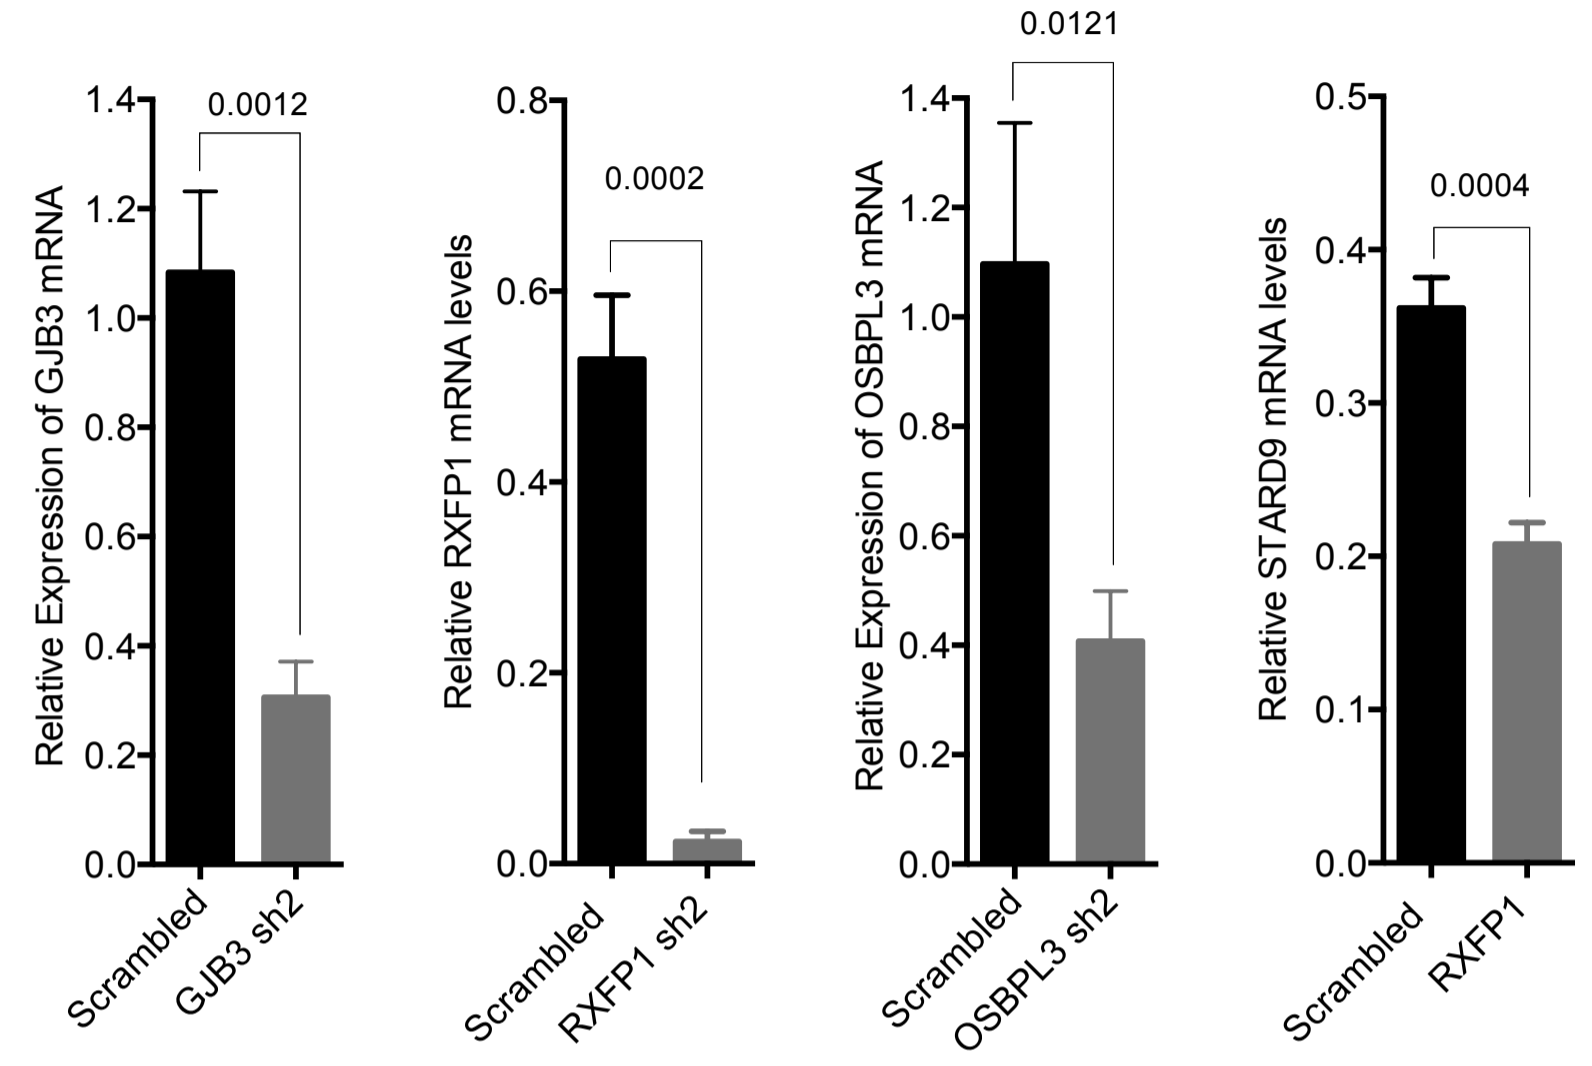

**C: Chr. number 2nd shRNA**

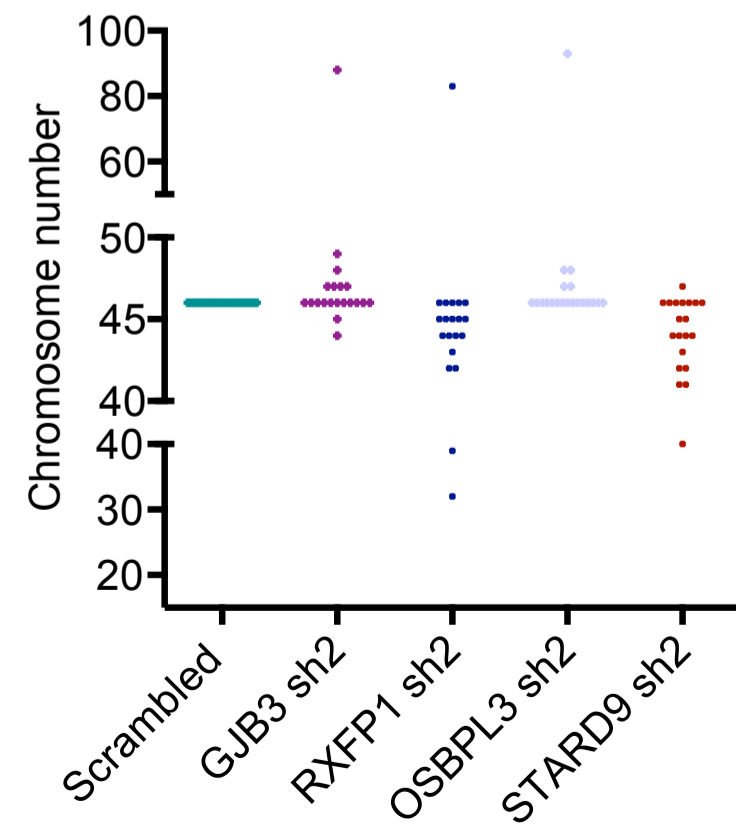

**D**

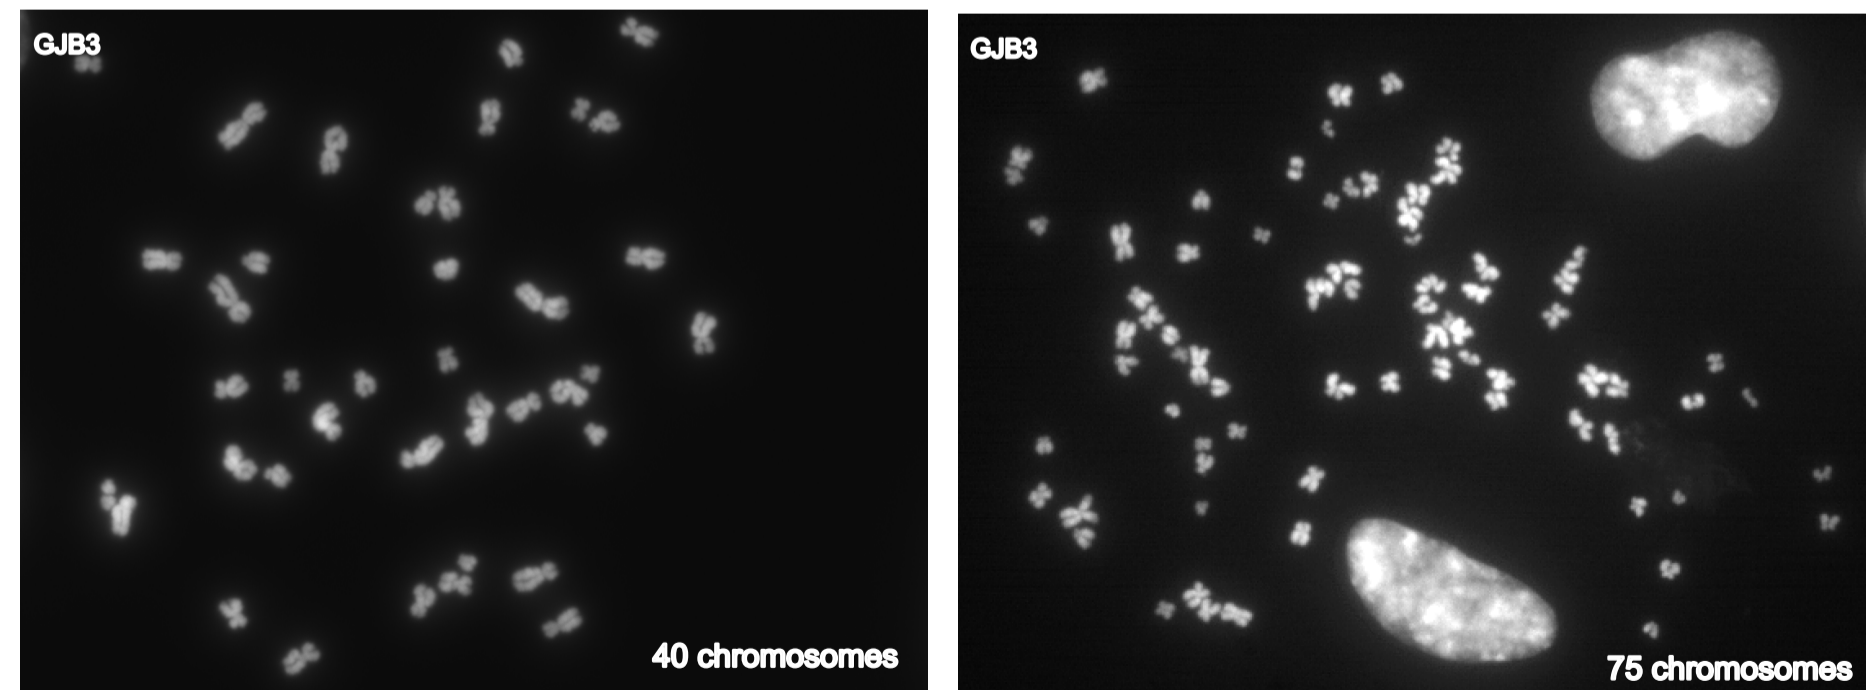

Supplement: embj0034-1371-sd1.pdf [file embj0034-1371-sd1.pdf]

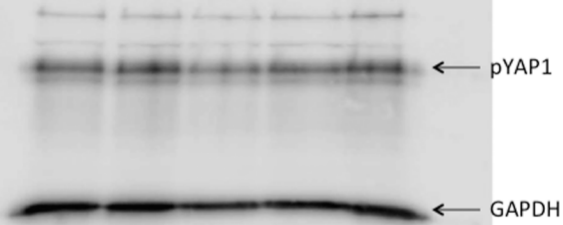

Supplement: embj0034-1371-sd10.pdf [file embj0034-1371-sd10.pdf]

Telo-probe →

BJ-hTERT                  BJ  
39 43 scr 39 43 scr

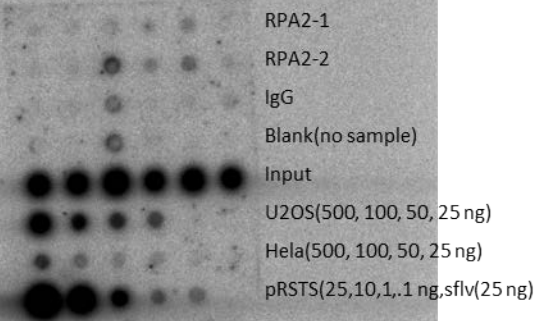

BJ-hTERT                  BJ  
39 43 scr 39 43 scr

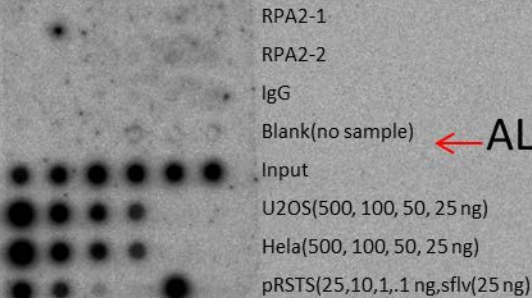

← ALU-probe

Supplement: embj0034-1371-sd13.pdf [file embj0034-1371-sd13.pdf]

A

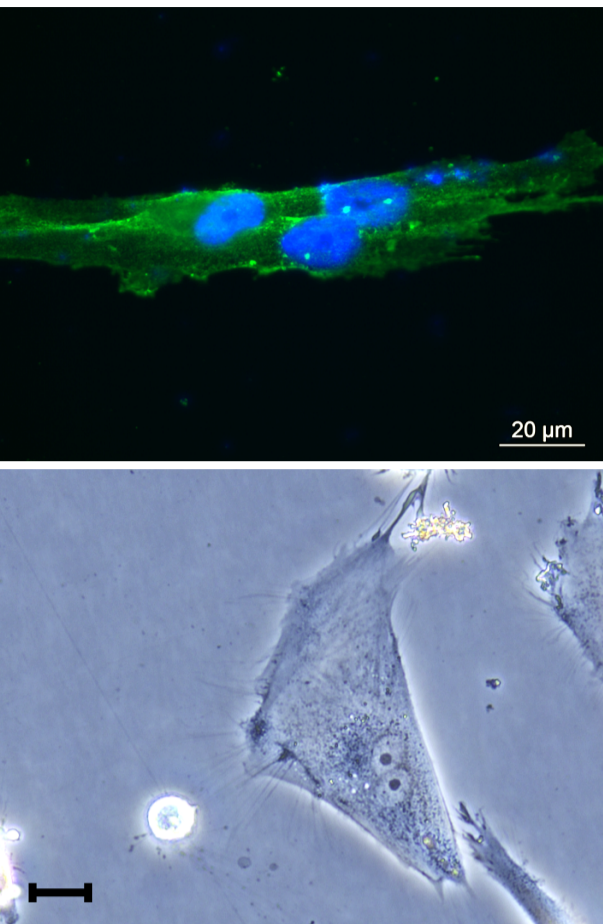

B

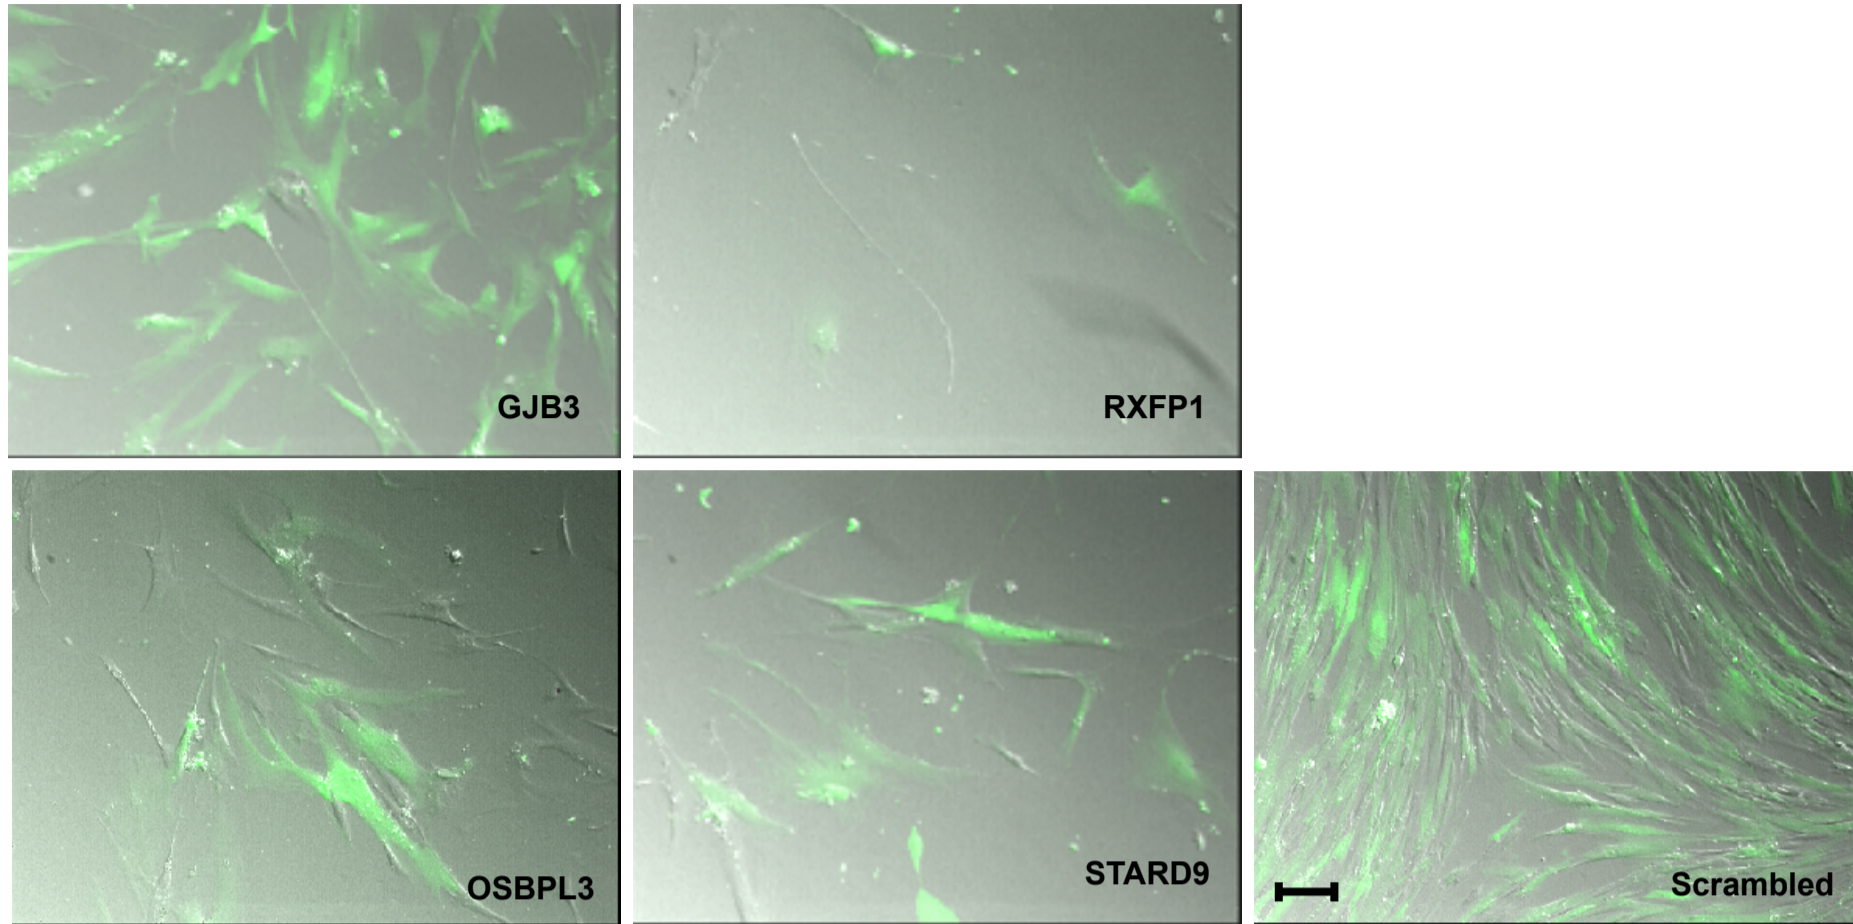

C

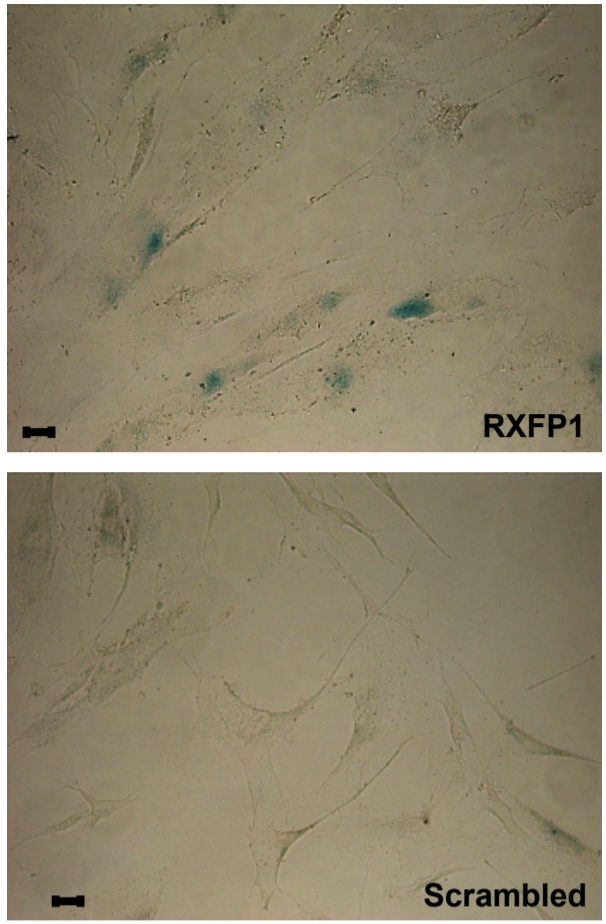

D

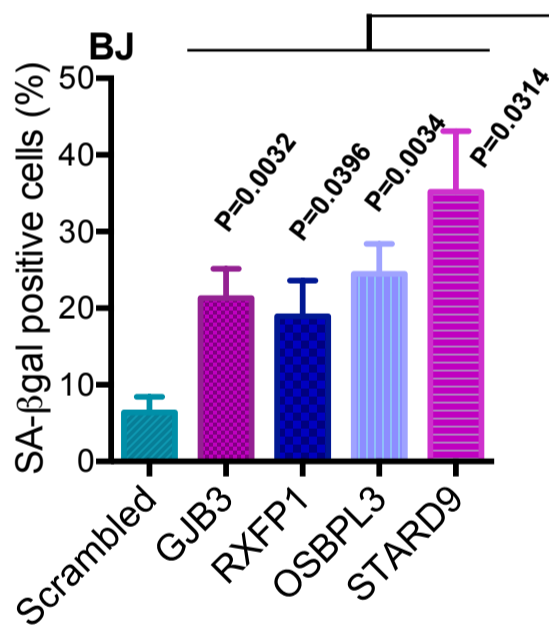

E

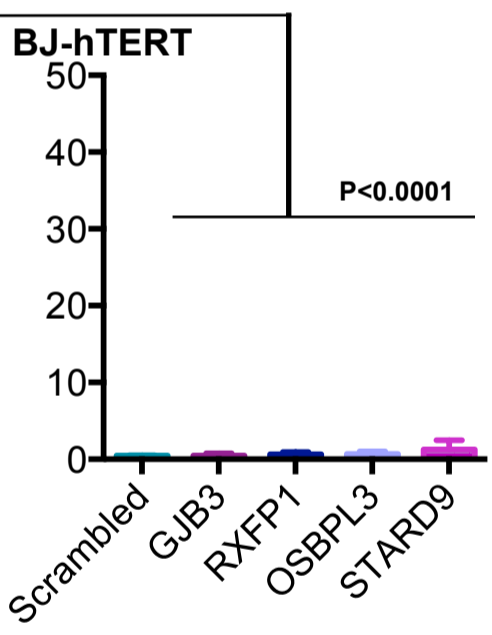

F

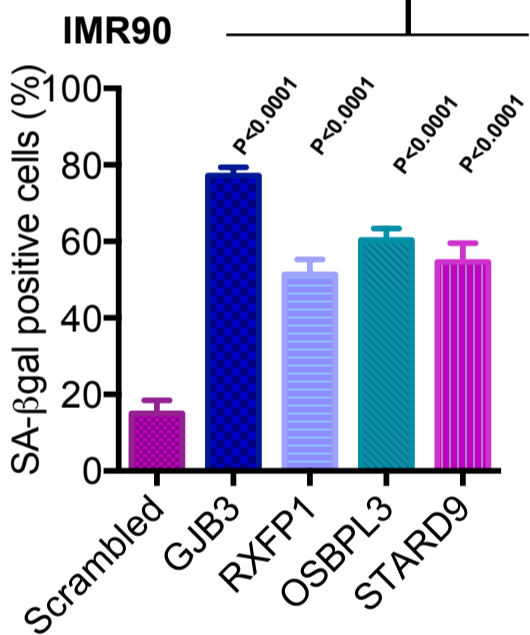

G

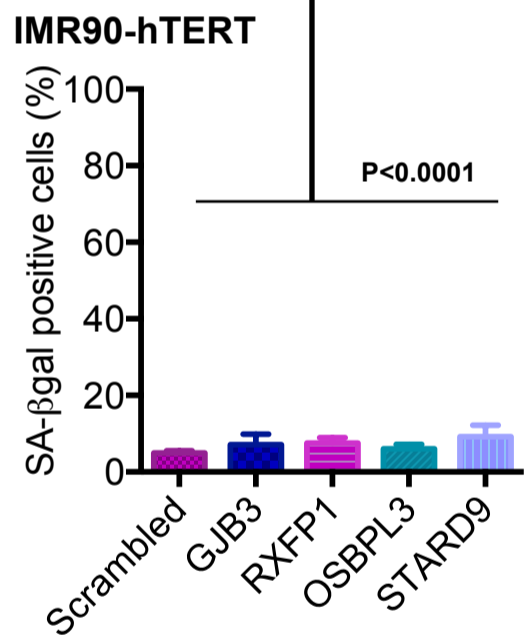

H

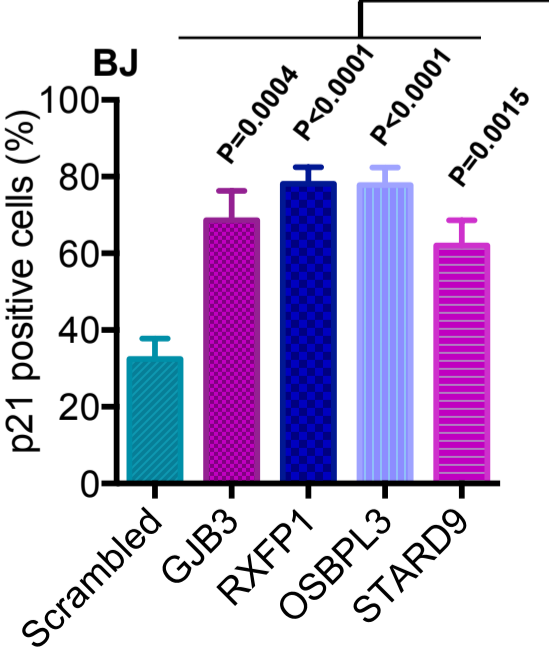

I

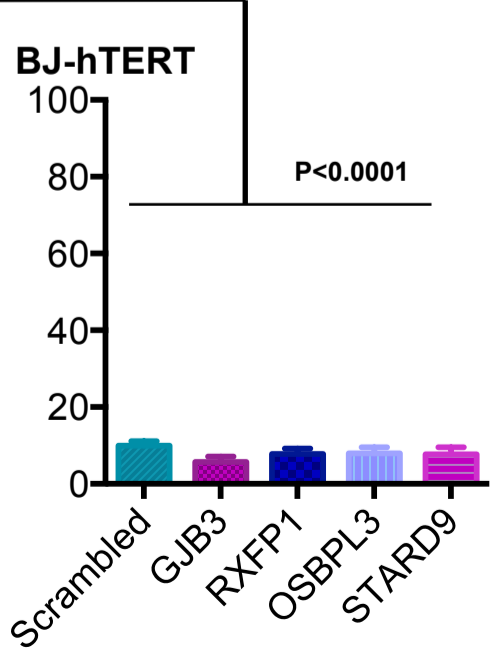

J

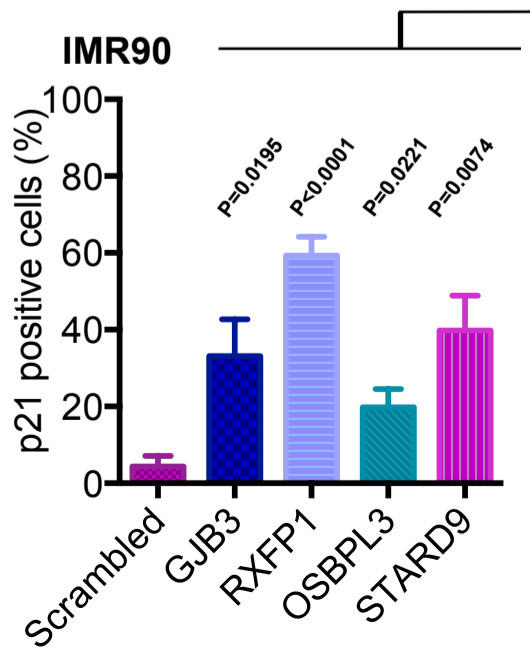

K

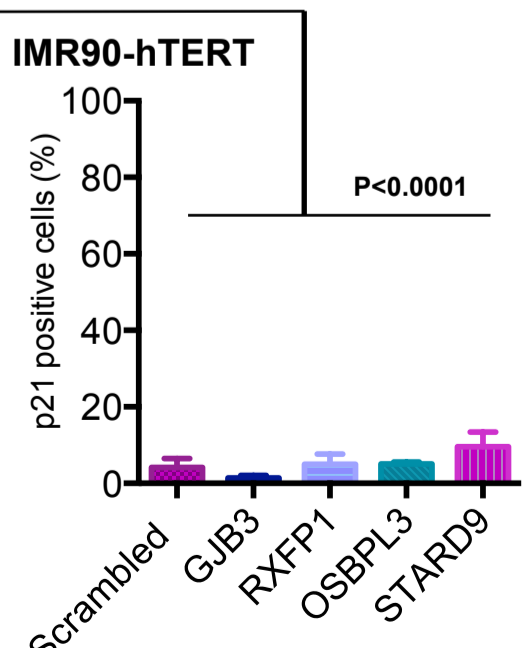

L

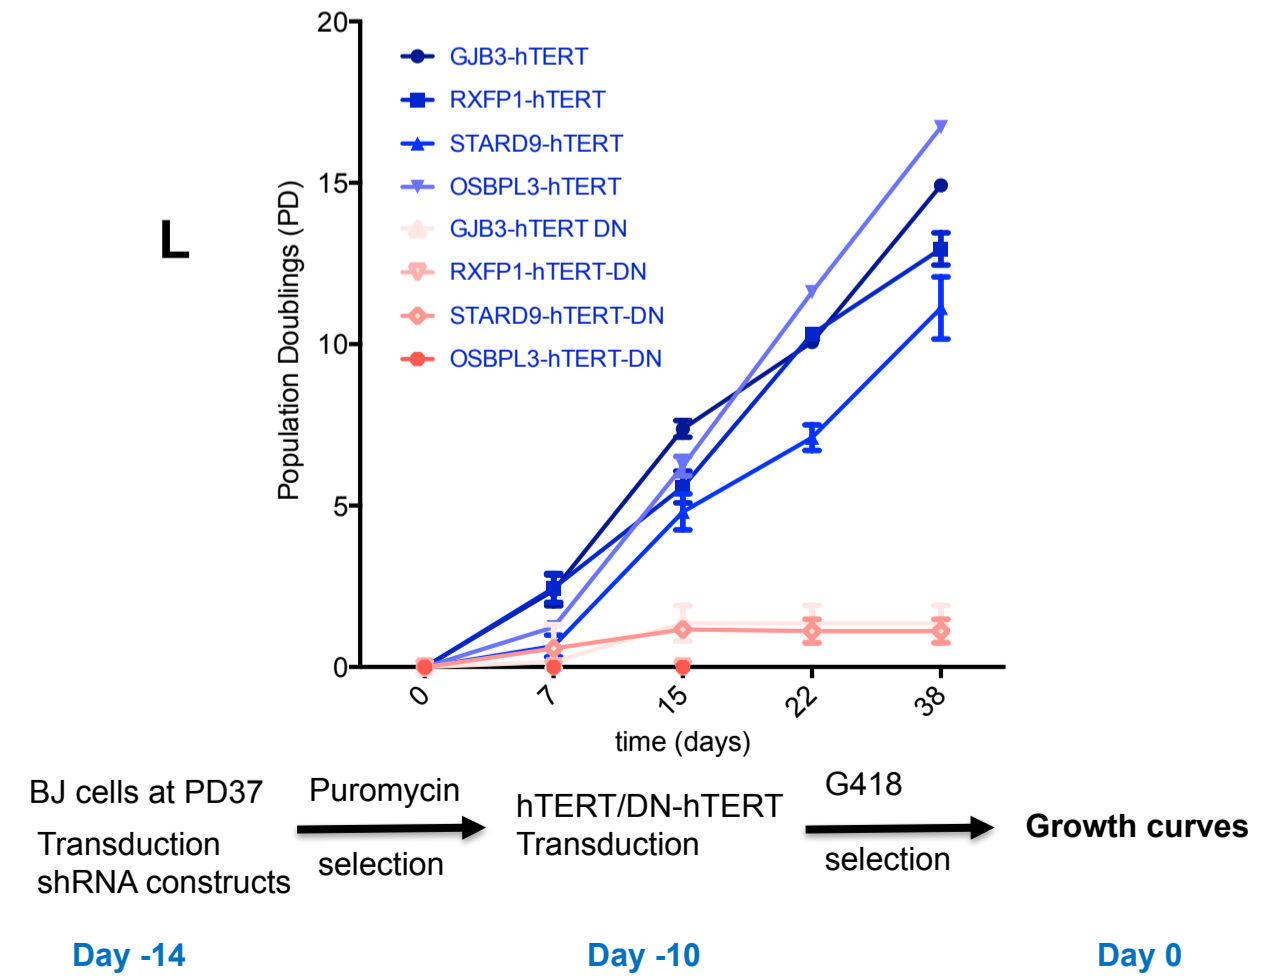

Supplement: embj0034-1371-sd2.pdf [file embj0034-1371-sd2.pdf]

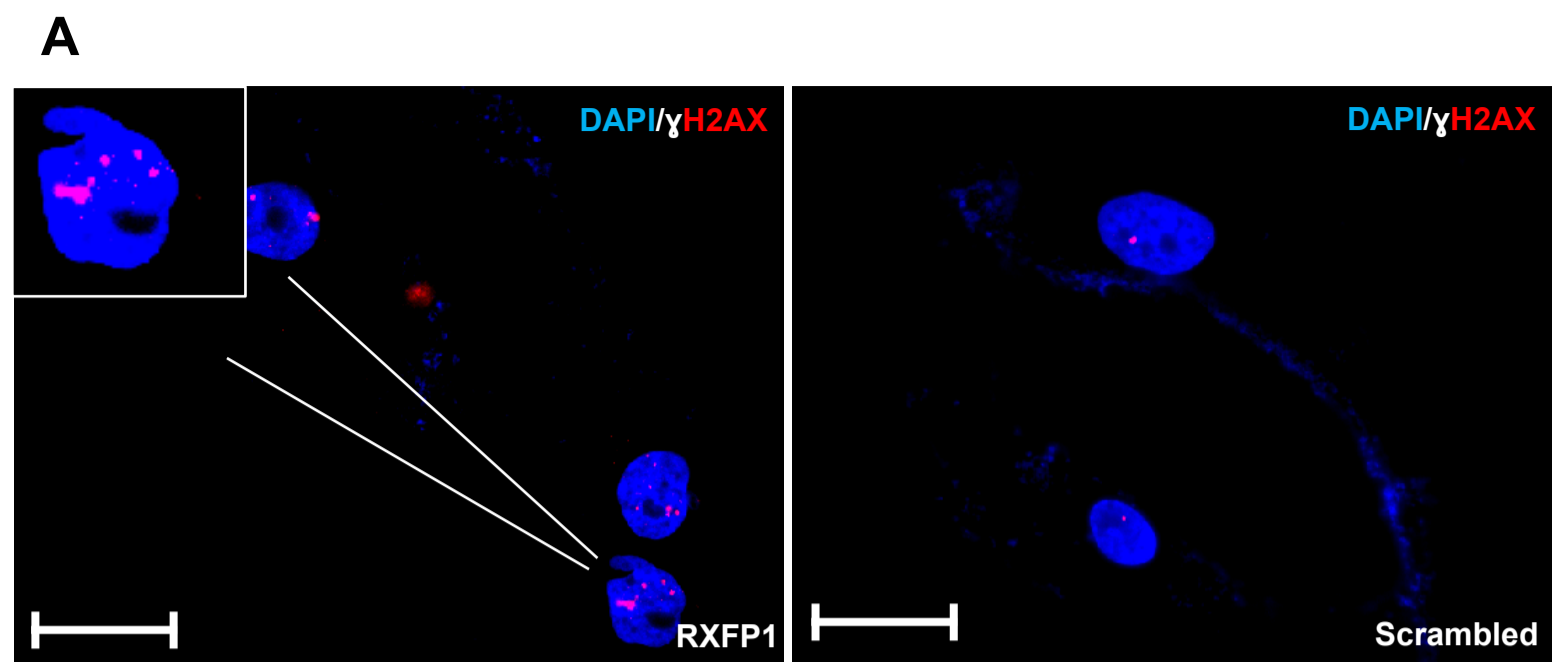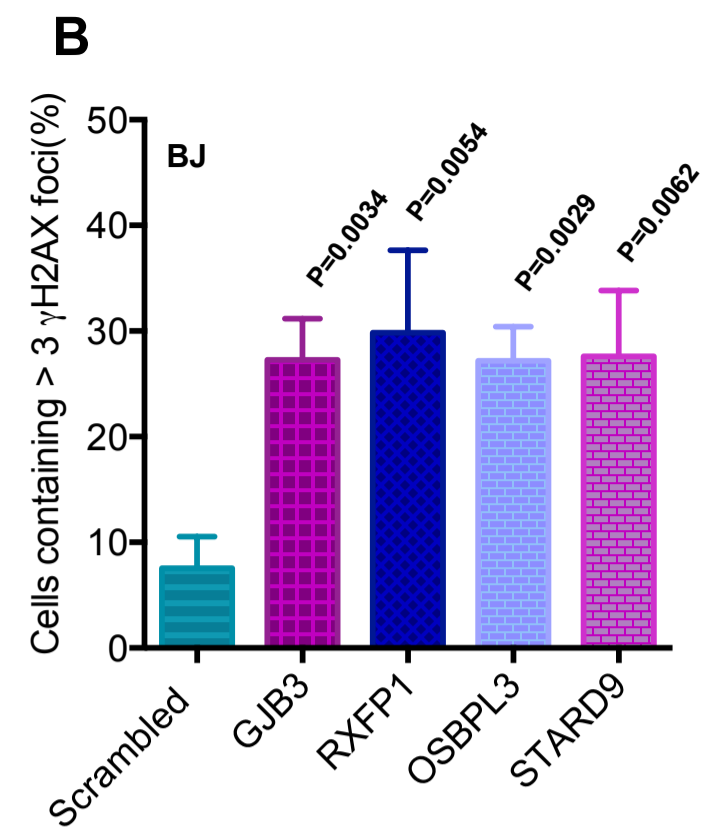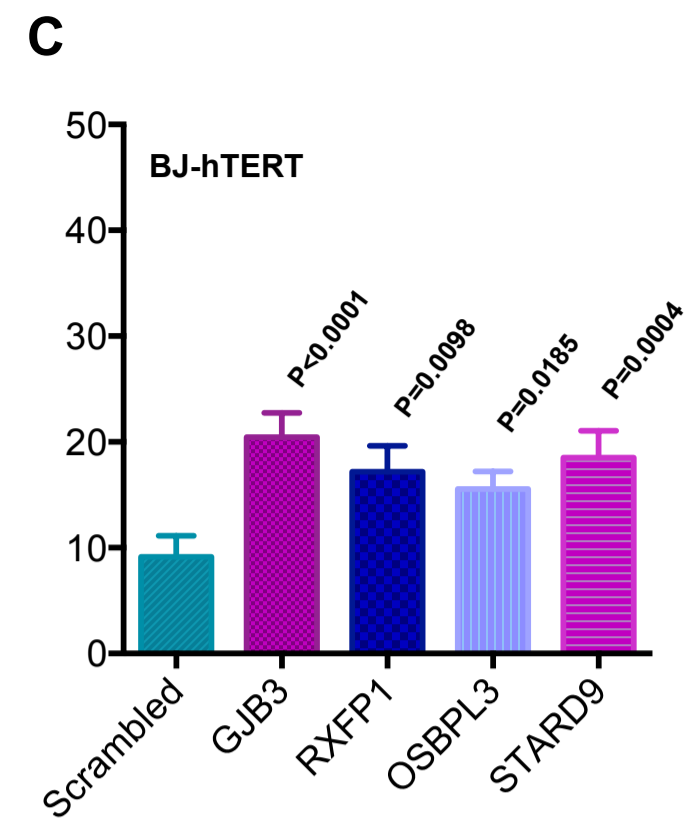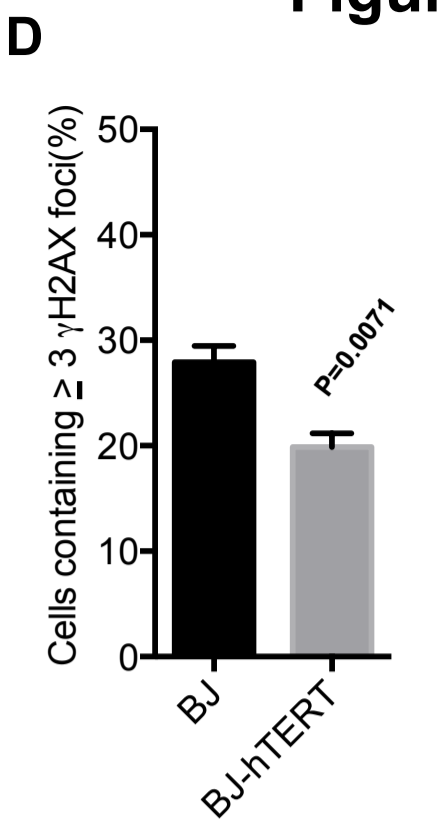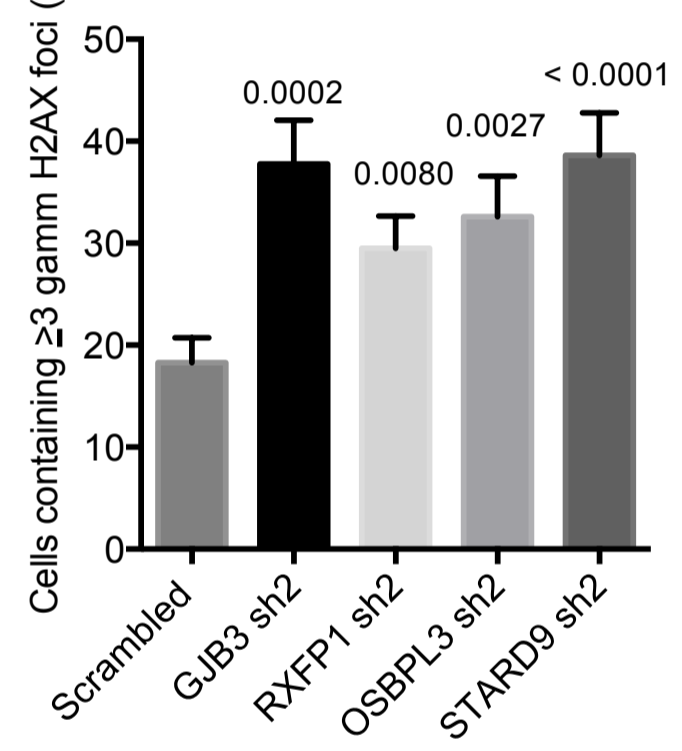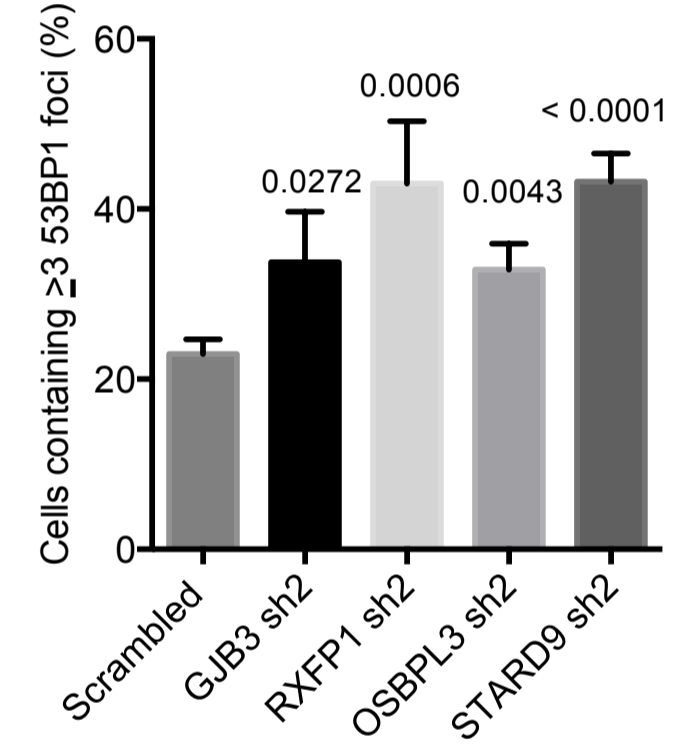

2nd shRNAs

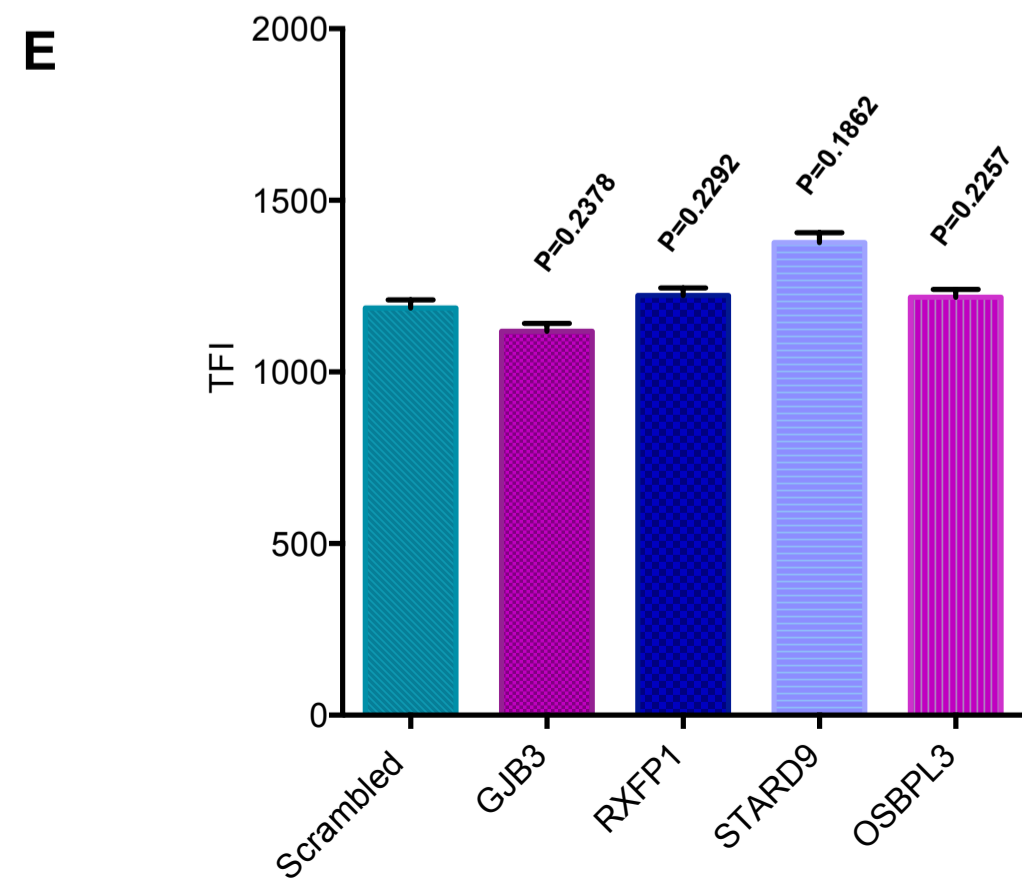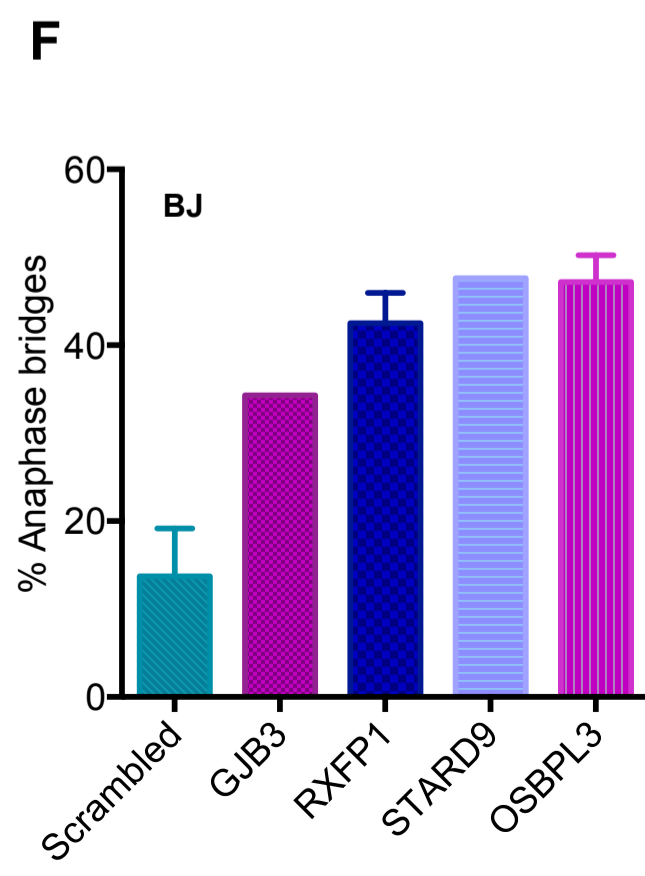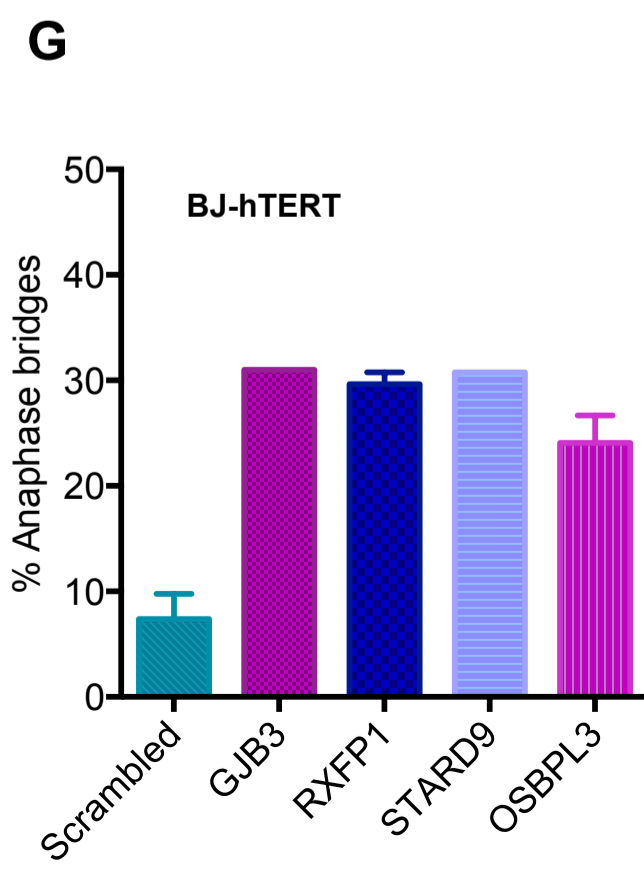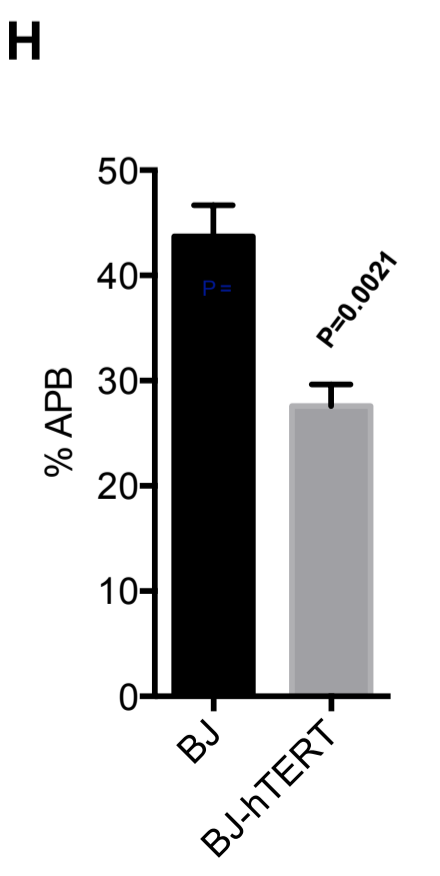

Supplement: embj0034-1371-sd3.pdf [file embj0034-1371-sd3.pdf]

**A**

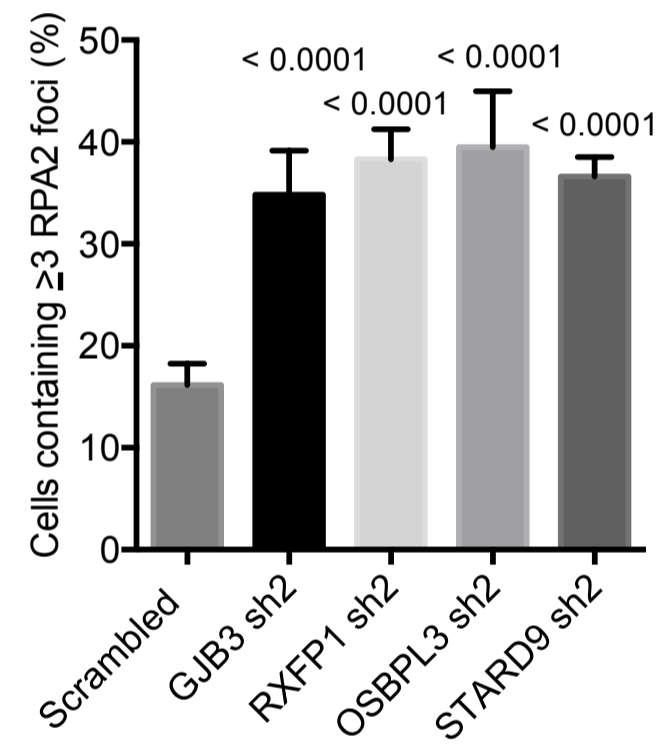

**B**

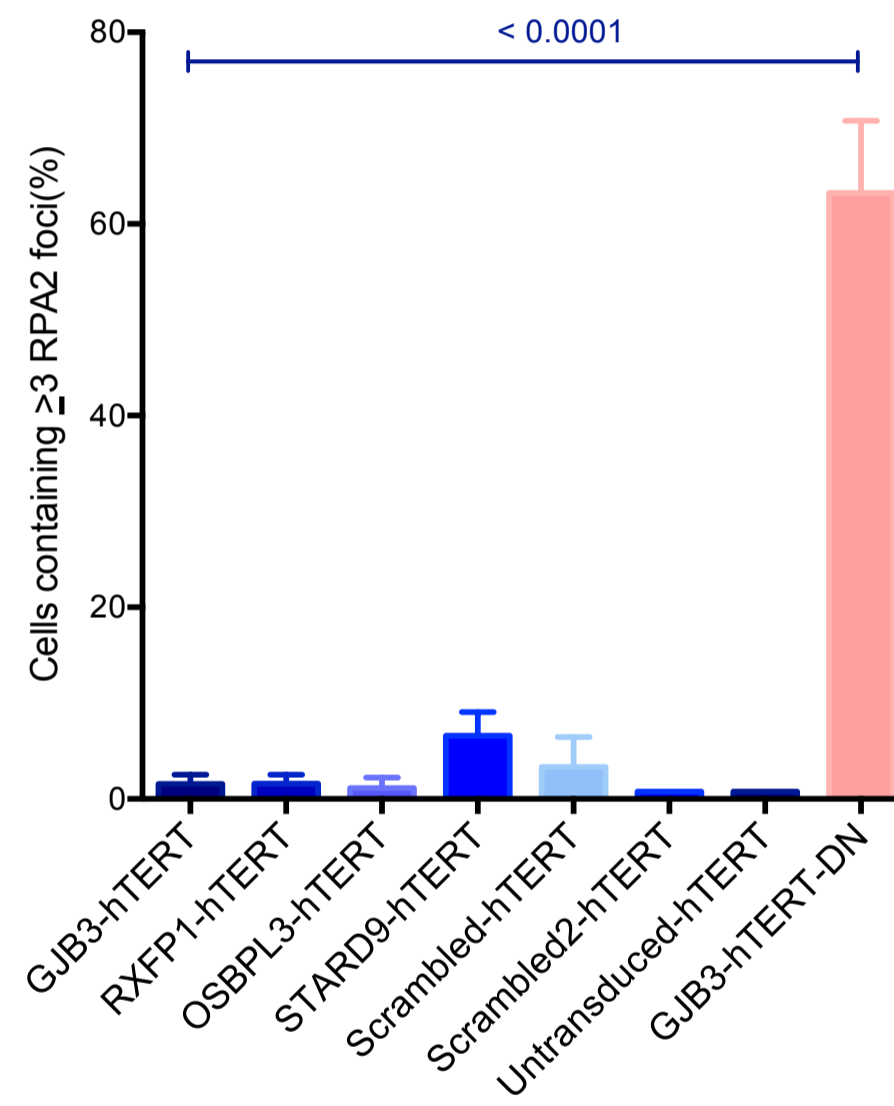

Supplement: embj0034-1371-sd4.pdf [file embj0034-1371-sd4.pdf]

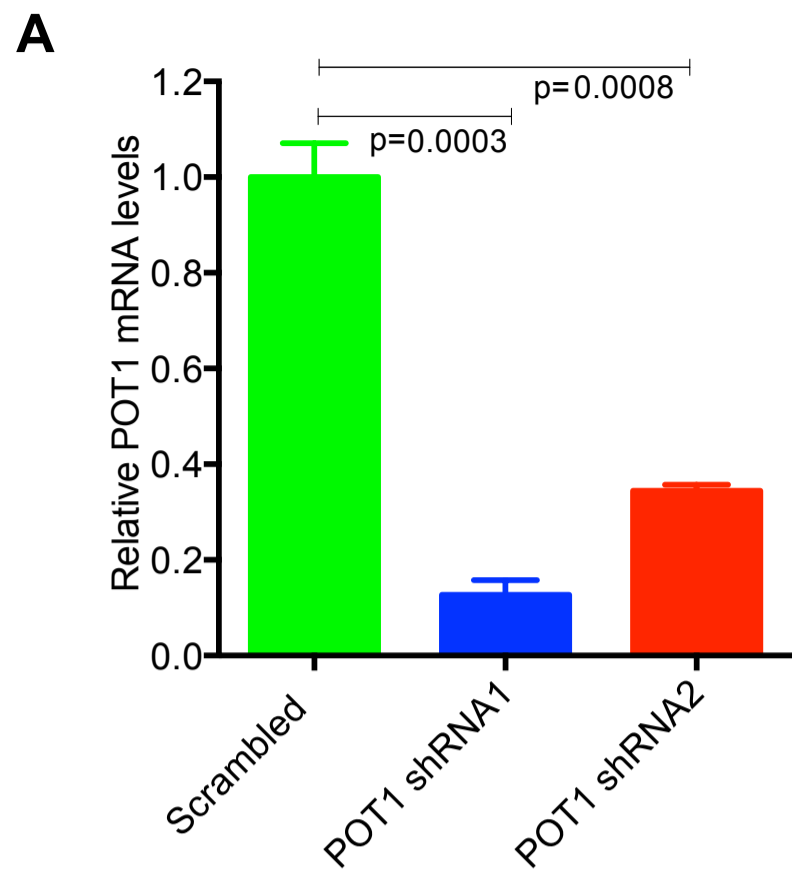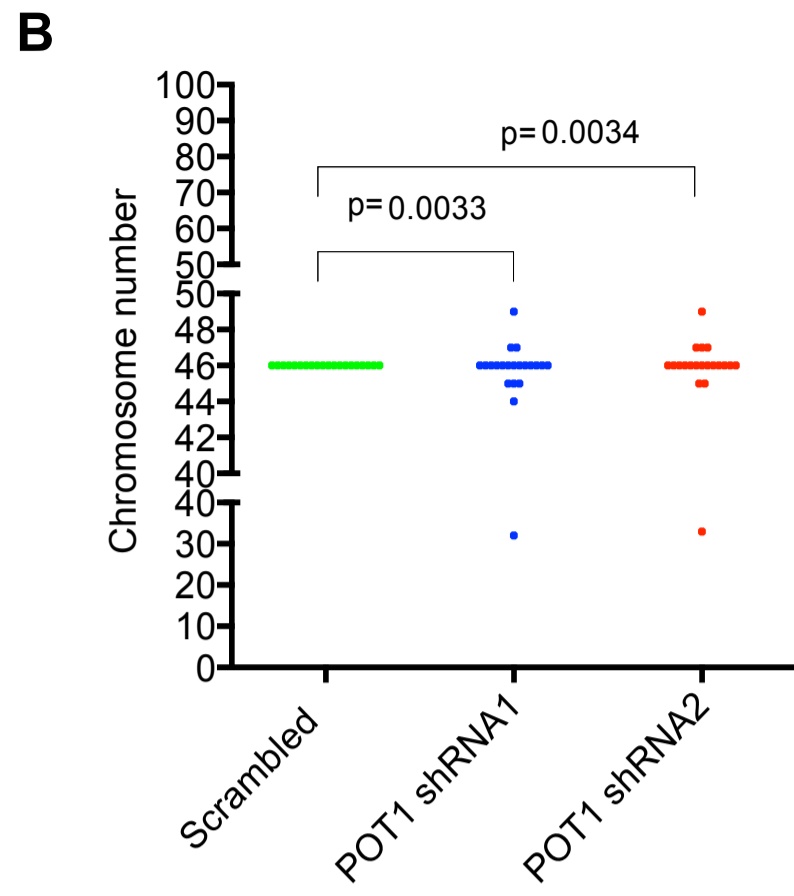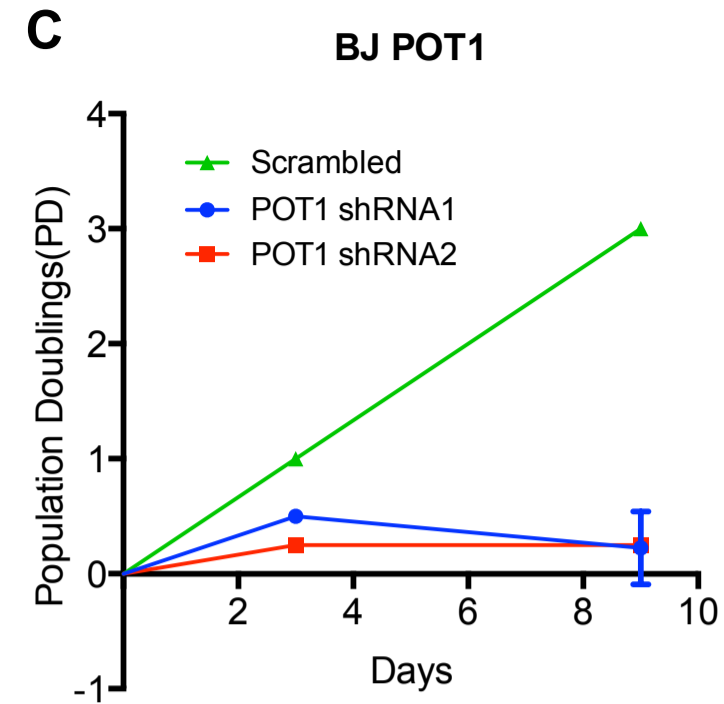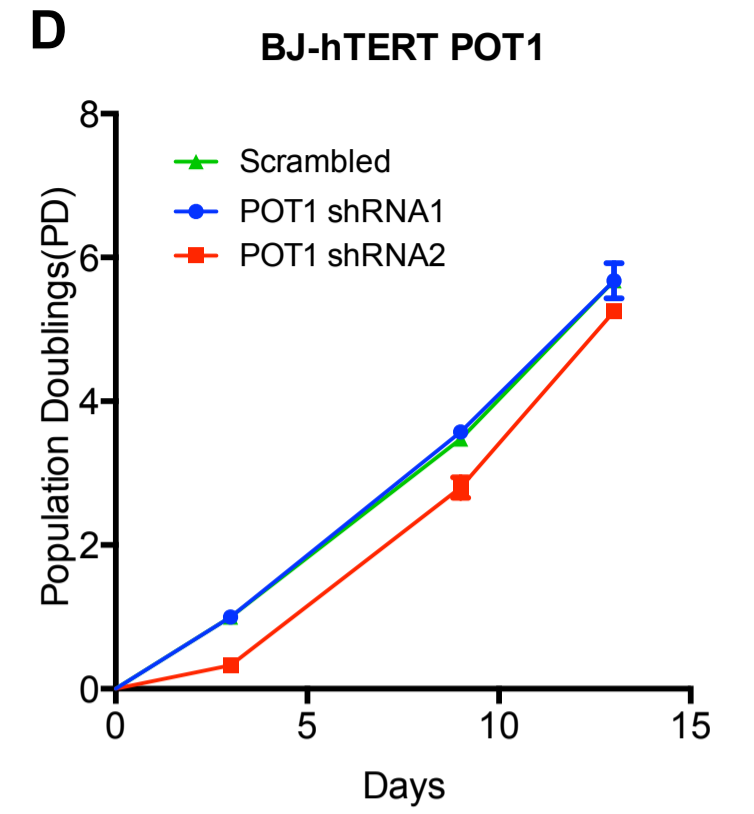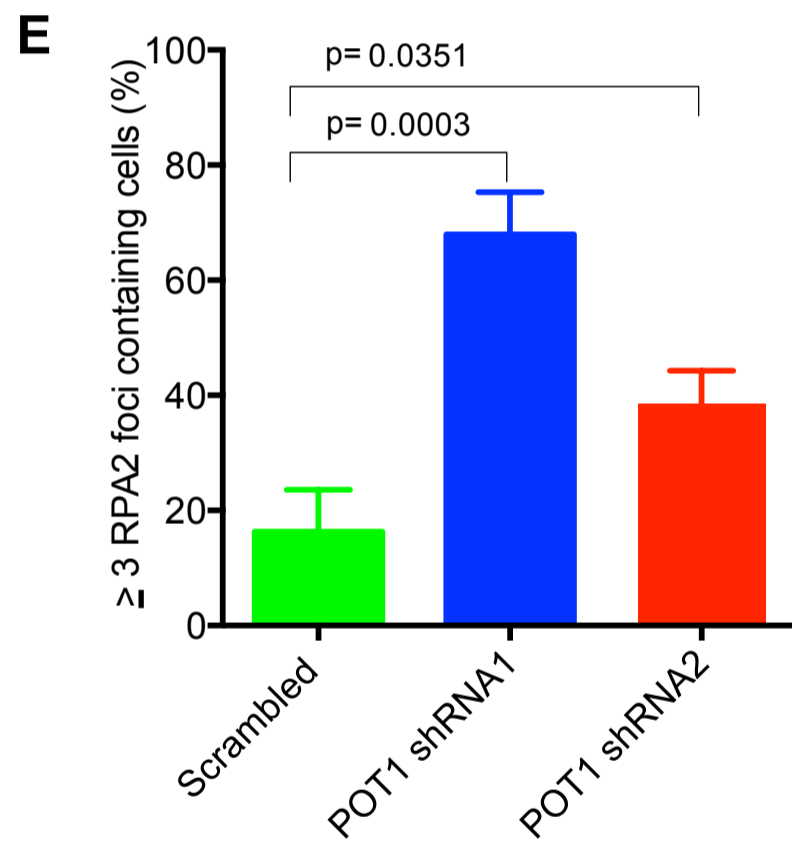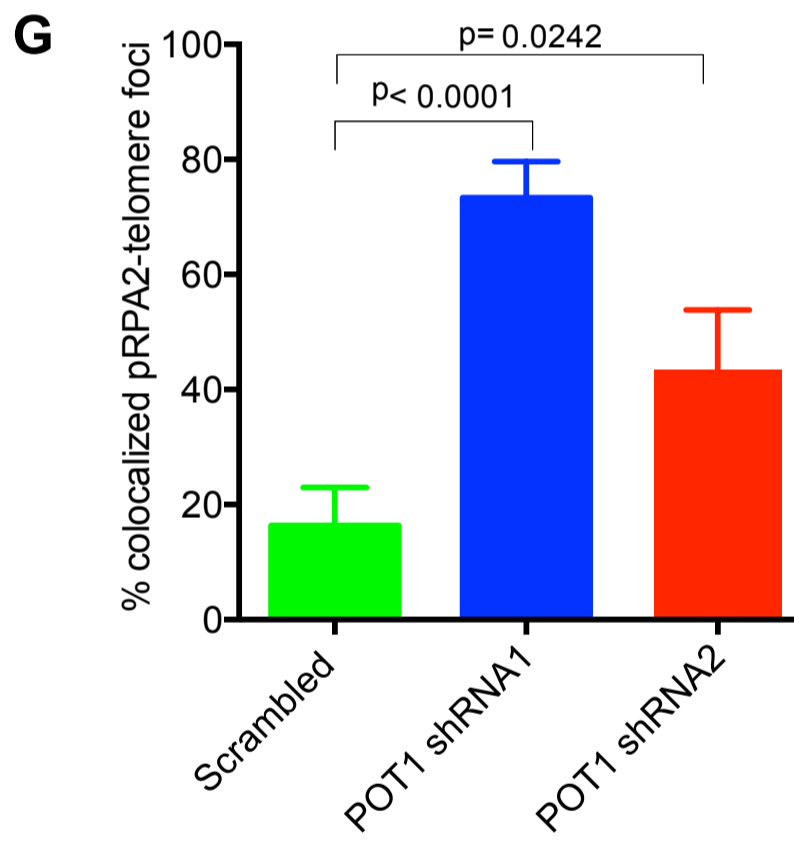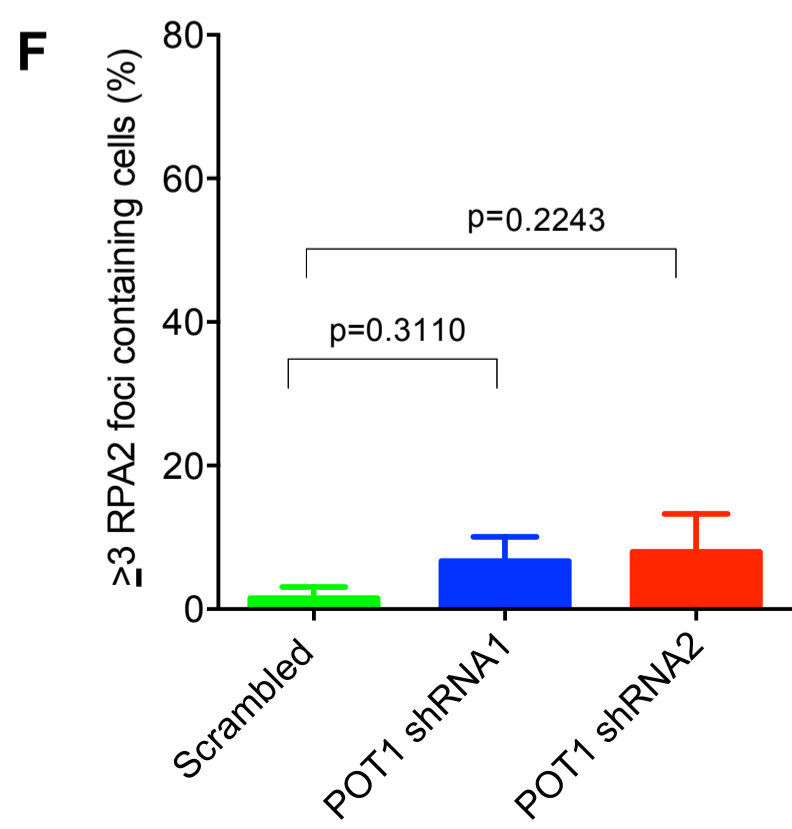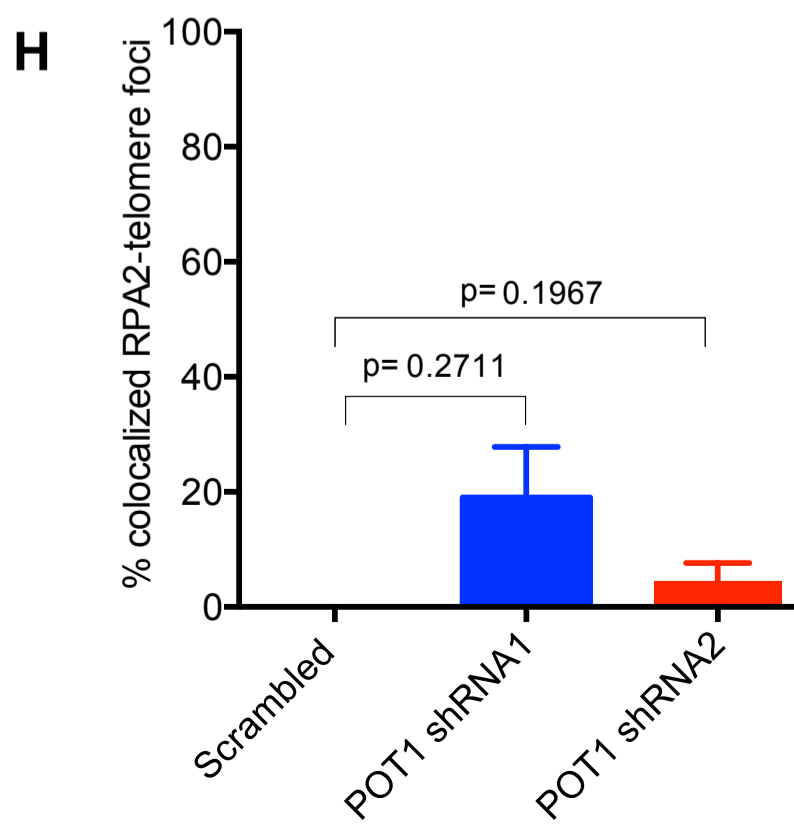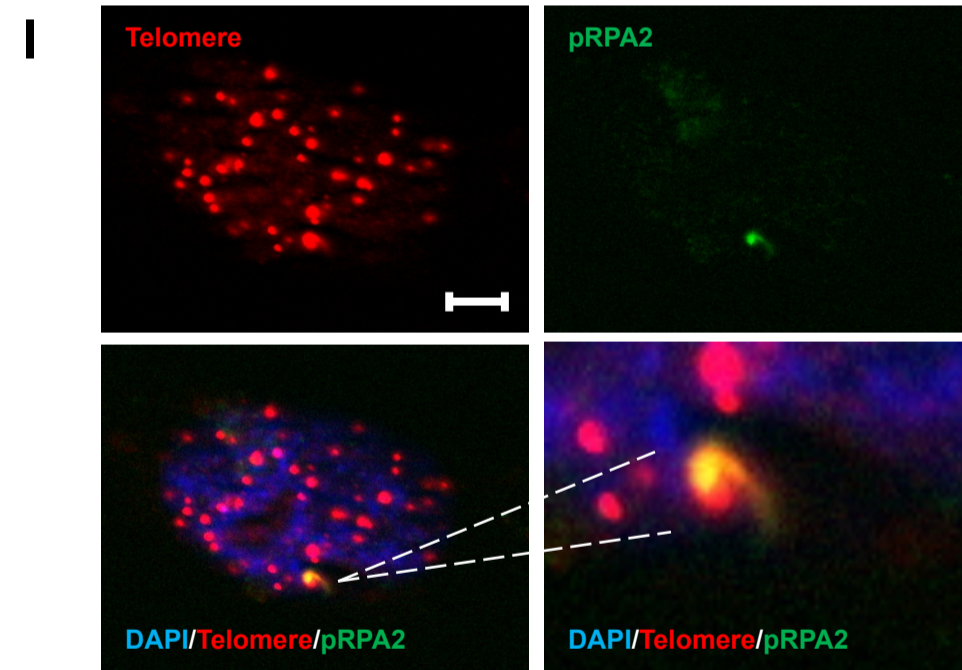

Supplement: embj0034-1371-sd5.pdf [file embj0034-1371-sd5.pdf]

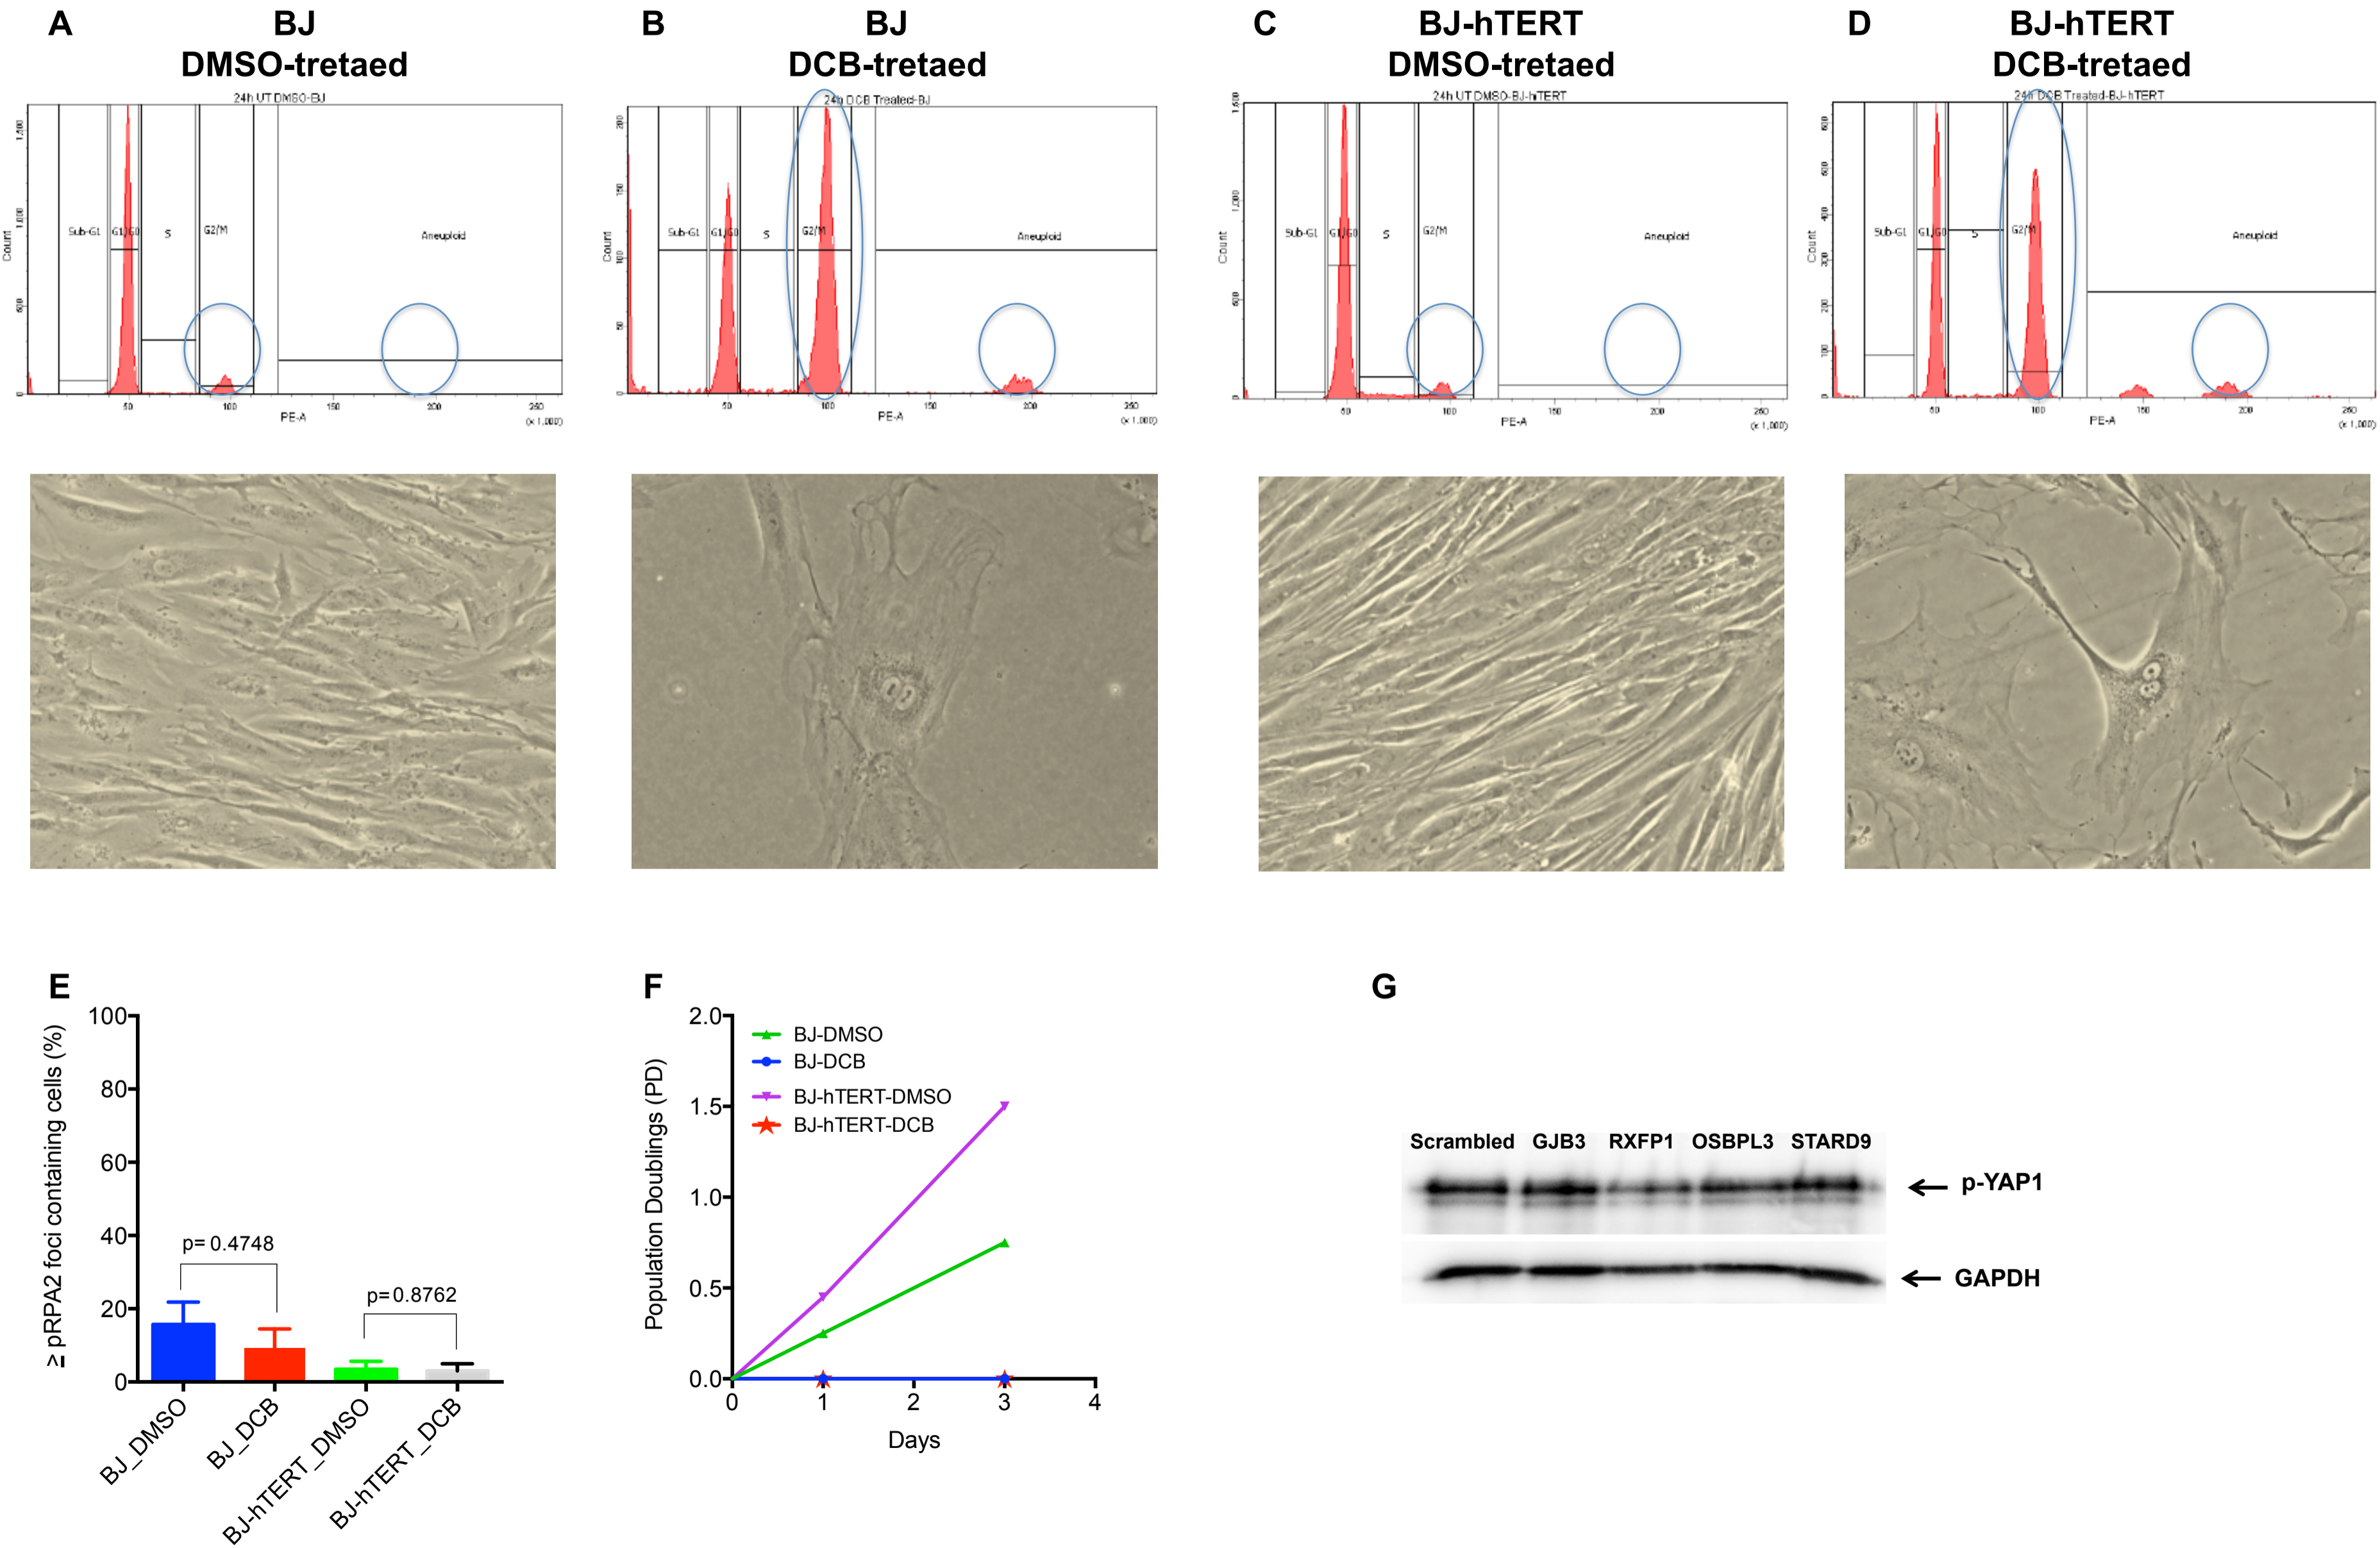

Supplement: embj0034-1371-sd6.pdf [file embj0034-1371-sd6.pdf]
